# Supplementary material for: The Molecular Docking of MAX Fungal Effectors with Plant HMA Domain-Binding Proteins
Source: MDPI journal article supplement (doi:10.3390/ijms242015239), 2023-10-16

# The Molecular docking of MAX fungal effectors with plant HMA domain binding proteins

Lina Rozano <sup>1,2</sup>, James K. Hane <sup>2,3</sup>, and Ricardo L. Mancera <sup>1,2\*</sup>

<sup>1</sup>Curtin Medical School, Curtin Health Innovation Research Institute, GPO Box U1987, Perth WA 6845, Australia

<sup>2</sup>Curtin Institute for Data Science, Curtin University, GPO Box U1987, Perth WA 6845, Australia

<sup>3</sup>Centre for Crop and Disease Management, School of Molecular and Life Sciences, Curtin University, GPO Box U1987, Perth WA 6845, Australia

\*Correspondence: R.Mancera@curtin.edu.au (R. L. M.)

## Supplementary Materials

**Table S1:** List of available experimental structures of effector proteins in complex with their respective host receptor binding partner (bound) used in benchmarking studies.

| Structural family | Fungal effector | Host receptor binding partner                  | PDB ID (chain from plant:chain from effector) |
|-------------------|-----------------|------------------------------------------------|-----------------------------------------------|
| MAX-like          | Avr1CO39        | RGA5                                           | 5ZNG A:C                                      |
|                   | AvrPia          | PikpHMA                                        | 6Q76 A:B                                      |
|                   | AvrPikC         | PikhHMA                                        | 7A8X B,E:C,F                                  |
|                   | AvrPikD         | PikmHMA                                        | 6FU9 A,C:B,D                                  |
|                   | AvrPikE         | PikmHMA<br>PikpHMA<br>PikpHMA <sup>NK-KE</sup> | 6FUB A:B<br>6G11 B,E:C,F<br>6R8M F:G          |
|                   | AvrPikF         | OsHIPP19                                       | 7B1I B:C                                      |
|                   | ApikL2F         | sHMA94                                         | 7NMM<br>A,B,C,D,E,F,G,H:I,J,K,L,M,N,O,P       |

**Table S2.** Top 10 best DockQ scores, and rankings based on ZDOCK and ZRANK scores. Rankings shown in bold font indicate a top-10 pose for the respective scoring function.

| Effector-host<br>receptor binding<br>partner complex | DockQ<br>ranking | DockQ<br>score | ZDOCK<br>ranking | ZDOCK<br>score | ZRANK<br>ranking | ZRANK<br>score |
|------------------------------------------------------|------------------|----------------|------------------|----------------|------------------|----------------|
| AvrICO39-RGA5<br>(5zngAC)                            | 1                | 0.967          | 756              | 34.19          | 35               | -74.5563       |
|                                                      | 2                | 0.961          | 12               | 42.07          | 28               | -75.754        |
|                                                      | 3                | 0.933          | 155              | 37.24          | 103              | -68.3334       |
|                                                      | 4                | 0.933          | 107              | 37.97          | 207              | -63.7273       |
|                                                      | 5                | 0.931          | 105              | 37.98          | 84               | -69.7212       |
|                                                      | 6                | 0.928          | 1157             | 33.37          | 165              | -65.6112       |
|                                                      | 7                | 0.918          | 380              | 35.56          | 43               | -73.7114       |
|                                                      | 8                | 0.912          | 43               | 39.69          | <b>1</b>         | -89.5292       |
|                                                      | 9                | 0.895          | 128              | 37.55          | 72               | -70.6197       |
|                                                      | 10               | 0.883          | 259              | 36.3           | 47               | -73.1283       |
| AvrPia-PikpHMA<br>(6q76AB)                           | 1                | 0.962          | <b>3</b>         | 42.47          | 212              | -64.0926       |
|                                                      | 2                | 0.942          | 209              | 36.35          | 157              | -66.5047       |
|                                                      | 3                | 0.941          | 289              | 35.67          | 156              | -66.5239       |
|                                                      | 4                | 0.926          | 241              | 36.06          | 162              | -66.1953       |
|                                                      | 5                | 0.917          | 42               | 39.27          | 149              | -66.8722       |
|                                                      | 6                | 0.899          | 33               | 39.67          | 137              | -67.4449       |
|                                                      | 7                | 0.893          | 588              | 34.05          | 296              | -60.2427       |
|                                                      | 8                | 0.886          | 854              | 33.25          | 99               | -69.7505       |
|                                                      | 9                | 0.882          | 131              | 37.29          | 672              | -49.3354       |
|                                                      | 10               | 0.875          | 909              | 33.12          | 152              | -66.6196       |
| AvrPikC-<br>PikhHMA<br>(7a8xBC)                      | 1                | 0.917          | <b>2</b>         | 60.16          | <b>1</b>         | -88.0183       |
|                                                      | 2                | 0.91           | <b>1</b>         | 61.74          | 64               | -70.0846       |
|                                                      | 3                | 0.888          | 11               | 53.75          | 13               | -79.7873       |
|                                                      | 4                | 0.888          | <b>9</b>         | 54.67          | 43               | -72.5972       |
|                                                      | 5                | 0.886          | <b>5</b>         | 57.62          | 350              | -55.8018       |
|                                                      | 6                | 0.883          | 13               | 51.89          | 144              | -64.4398       |
|                                                      | 7                | 0.878          | 36               | 46.23          | 116              | -66.0273       |
|                                                      | 8                | 0.878          | <b>6</b>         | 57.58          | <b>4</b>         | -83.0148       |
|                                                      | 9                | 0.874          | 27               | 47.89          | 284              | -58.2618       |
|                                                      | 10               | 0.871          | 15               | 50.72          | 14               | -79.3699       |
| AvrPikC-<br>PikhHMA<br>(7a8xEF)                      | 1                | 0.919          | <b>1</b>         | 73.13          | 25               | -85.0809       |
|                                                      | 2                | 0.916          | <b>2</b>         | 69.6           | 22               | -85.3532       |
|                                                      | 3                | 0.909          | 18               | 57.03          | 131              | -68.1456       |
|                                                      | 4                | 0.904          | <b>8</b>         | 60.38          | <b>1</b>         | -109.556       |
|                                                      | 5                | 0.888          | <b>4</b>         | 62.24          | 11               | -90.3229       |
|                                                      | 6                | 0.88           | 20               | 56.2           | 171              | -65.9198       |
|                                                      | 7                | 0.872          | <b>5</b>         | 62.03          | 43               | -79.4627       |
|                                                      | 8                | 0.865          | 15               | 58.39          | 689              | -47.1574       |

|                             |    |       |          |       |          |          |
|-----------------------------|----|-------|----------|-------|----------|----------|
|                             | 9  | 0.859 | 13       | 58.81 | 138      | -67.4861 |
|                             | 10 | 0.856 | 32       | 51.31 | 26       | -84.6148 |
| AvrPikD-PikmHMA<br>(6fu9AB) | 1  | 0.942 | <b>9</b> | 59.69 | 19       | -92.2094 |
|                             | 2  | 0.9   | <b>5</b> | 63.59 | <b>7</b> | -100.641 |
|                             | 3  | 0.889 | 11       | 58.79 | 1356     | -35.565  |
|                             | 4  | 0.887 | <b>6</b> | 62.86 | <b>8</b> | -100.329 |
|                             | 5  | 0.885 | 14       | 58.43 | 678      | -54.0966 |
|                             | 6  | 0.883 | <b>4</b> | 64.02 | <b>9</b> | -99.9212 |
|                             | 7  | 0.882 | 19       | 55.54 | 18       | -92.4467 |
|                             | 8  | 0.871 | <b>3</b> | 66.11 | <b>2</b> | -116.05  |
|                             | 9  | 0.862 | 17       | 56.25 | 17       | -92.4525 |
|                             | 10 | 0.859 | <b>8</b> | 60.01 | 227      | -70.3277 |
| AvrPikD-PikmHMA<br>(6fu9CD) | 1  | 0.941 | <b>3</b> | 62.21 | 14       | -100.436 |
|                             | 2  | 0.915 | <b>1</b> | 63.39 | 10       | -104.785 |
|                             | 3  | 0.91  | <b>2</b> | 62.8  | 9        | -104.797 |
|                             | 4  | 0.91  | <b>4</b> | 61.31 | <b>2</b> | -111.478 |
|                             | 5  | 0.9   | 65       | 49.26 | 17       | -98.704  |
|                             | 6  | 0.895 | 13       | 55.59 | <b>3</b> | -110.116 |
|                             | 7  | 0.894 | 34       | 51.5  | 27       | -93.2712 |
|                             | 8  | 0.861 | 90       | 47.9  | 55       | -85.0911 |
|                             | 9  | 0.856 | 66       | 49.23 | 605      | -54.2401 |
|                             | 10 | 0.852 | 54       | 49.91 | 428      | -60.3741 |
| AvrPikE-PikmHMA<br>(6fubAB) | 1  | 0.935 | <b>4</b> | 58.9  | 15       | -90.305  |
|                             | 2  | 0.925 | <b>1</b> | 64.49 | 94       | -76.1576 |
|                             | 3  | 0.888 | <b>9</b> | 55.74 | 34       | -83.4692 |
|                             | 4  | 0.879 | 13       | 53.73 | <b>3</b> | -102.602 |
|                             | 5  | 0.874 | <b>6</b> | 56.82 | 1084     | -42.5602 |
|                             | 6  | 0.867 | 51       | 48.08 | 551      | -55.3972 |
|                             | 7  | 0.867 | 17       | 51.68 | 143      | -71.2714 |
|                             | 8  | 0.853 | 121      | 44.48 | 796      | -49.6282 |
|                             | 9  | 0.852 | <b>8</b> | 56.06 | 698      | -51.793  |
|                             | 10 | 0.849 | 50       | 48.12 | 930      | -46.3857 |
| AvrPikE-PikpHMA<br>(6gl1BC) | 1  | 0.908 | 29       | 51.14 | 31       | -76.3809 |
|                             | 2  | 0.899 | 22       | 53.06 | 385      | -54.6336 |
|                             | 3  | 0.892 | 47       | 48.72 | 20       | -77.9749 |
|                             | 4  | 0.892 | <b>3</b> | 62.15 | <b>1</b> | -110.703 |
|                             | 5  | 0.885 | <b>1</b> | 65.69 | <b>2</b> | -98.6024 |
|                             | 6  | 0.884 | <b>4</b> | 60.62 | <b>3</b> | -95.3788 |
|                             | 7  | 0.875 | <b>5</b> | 60.16 | 65       | -71.5955 |
|                             | 8  | 0.865 | 16       | 55.34 | <b>4</b> | -94.4781 |
|                             | 9  | 0.864 | 27       | 51.3  | <b>6</b> | -88.4164 |
|                             | 10 | 0.85  | 15       | 55.88 | 33       | -75.8961 |
|                             | 1  | 0.947 | <b>4</b> | 58.82 | 22       | -79.1564 |

|                                  |    |       |           |       |           |          |
|----------------------------------|----|-------|-----------|-------|-----------|----------|
| AvrPikE-PikpHMA<br>(6g11EF)      | 2  | 0.92  | <b>9</b>  | 55.12 | 76        | -70.4429 |
|                                  | 3  | 0.897 | <b>10</b> | 54.72 | 43        | -74.0056 |
|                                  | 4  | 0.893 | 16        | 52.35 | <b>2</b>  | -93.2629 |
|                                  | 5  | 0.879 | <b>2</b>  | 60.49 | 12        | -81.8776 |
|                                  | 6  | 0.875 | <b>6</b>  | 58.05 | <b>1</b>  | -96.3179 |
|                                  | 7  | 0.869 | 19        | 51.26 | <b>7</b>  | -83.8453 |
|                                  | 8  | 0.865 | <b>3</b>  | 59.73 | <b>6</b>  | -84.8633 |
|                                  | 9  | 0.853 | 122       | 44.01 | 653       | -47.2859 |
|                                  | 10 | 0.852 | 14        | 52.95 | 352       | -55.9582 |
| AvrPikE-PikpHMA<br>mut (6r8mFG)  | 1  | 0.924 | <b>2</b>  | 63.82 | 254       | -61.0644 |
|                                  | 2  | 0.901 | <b>1</b>  | 67.9  | <b>2</b>  | -102.771 |
|                                  | 3  | 0.871 | <b>5</b>  | 59.85 | <b>7</b>  | -88.5242 |
|                                  | 4  | 0.87  | <b>10</b> | 56.21 | 768       | -44.7472 |
|                                  | 5  | 0.857 | <b>9</b>  | 57.54 | 1369      | -27.2931 |
|                                  | 6  | 0.824 | <b>4</b>  | 61.54 | 63        | -72.5668 |
|                                  | 7  | 0.822 | 59        | 45.79 | 571       | -50.0234 |
|                                  | 8  | 0.819 | 16        | 54.36 | 458       | -53.8054 |
|                                  | 9  | 0.818 | 25        | 51.15 | 160       | -65.0824 |
|                                  | 10 | 0.815 | 44        | 47.02 | 132       | -66.8959 |
| AvrPikF-<br>OsHIPP19<br>(7b11BC) | 1  | 0.928 | <b>9</b>  | 63.75 | 94        | -66.7719 |
|                                  | 2  | 0.917 | 11        | 61.41 | 985       | -32.7192 |
|                                  | 3  | 0.914 | 12        | 61.17 | <b>9</b>  | -94.1515 |
|                                  | 4  | 0.914 | <b>2</b>  | 72.73 | <b>8</b>  | -95.1279 |
|                                  | 5  | 0.907 | <b>3</b>  | 72.57 | 88        | -67.3141 |
|                                  | 6  | 0.899 | <b>6</b>  | 68.84 | <b>6</b>  | -97.2762 |
|                                  | 7  | 0.887 | <b>8</b>  | 65.44 | 14        | -87.9087 |
|                                  | 8  | 0.887 | <b>1</b>  | 75.98 | <b>3</b>  | -111.826 |
|                                  | 9  | 0.885 | 7         | 65.45 | <b>10</b> | -90.3786 |
|                                  | 10 | 0.88  | <b>4</b>  | 70.92 | <b>1</b>  | -125.125 |
| ApikL2F-sHMA94<br>(7nmmAI)       | 1  | 0.952 | <b>3</b>  | 62.99 | <b>1</b>  | -103.174 |
|                                  | 2  | 0.922 | <b>1</b>  | 68.51 | <b>9</b>  | -91.4234 |
|                                  | 3  | 0.921 | <b>6</b>  | 59.51 | 106       | -73.1485 |
|                                  | 4  | 0.918 | <b>2</b>  | 63.37 | 290       | -63.4232 |
|                                  | 5  | 0.896 | 23        | 50.8  | 180       | -68.3114 |
|                                  | 6  | 0.885 | <b>7</b>  | 57.68 | 616       | -51.7256 |
|                                  | 7  | 0.87  | 12        | 53.89 | <b>4</b>  | -97.8778 |
|                                  | 8  | 0.869 | 27        | 50.17 | 71        | -76.8299 |
|                                  | 9  | 0.864 | <b>4</b>  | 61.76 | 123       | -71.612  |
|                                  | 10 | 0.863 | <b>9</b>  | 56.02 | 178       | -68.4282 |
| ApikL2F-sHMA94<br>(7nmmBJ)       | 1  | 0.94  | 12        | 53.48 | <b>1</b>  | -102.48  |
|                                  | 2  | 0.93  | <b>8</b>  | 55.53 | 21        | -88.9538 |
|                                  | 3  | 0.924 | <b>4</b>  | 57.62 | 159       | -72.0868 |
|                                  | 4  | 0.896 | <b>5</b>  | 57.52 | 702       | -49.6216 |



|                            |    |       |           |       |          |          |
|----------------------------|----|-------|-----------|-------|----------|----------|
|                            | 5  | 0.888 | 11        | 53.48 | 17       | -89.5989 |
|                            | 6  | 0.886 | <b>3</b>  | 58.31 | <b>9</b> | -93.9556 |
|                            | 7  | 0.885 | 42        | 47.7  | 287      | -64.9626 |
|                            | 8  | 0.876 | <b>1</b>  | 59.6  | 121      | -74.7666 |
|                            | 9  | 0.863 | 23        | 49.9  | 248      | -67.0649 |
|                            | 10 | 0.862 | <b>7</b>  | 55.59 | 116      | -75.0624 |
| ApikL2F-sHMA94<br>(7nmmCK) | 1  | 0.933 | <b>3</b>  | 61.34 | 14       | -88.5095 |
|                            | 2  | 0.911 | <b>4</b>  | 60.91 | <b>5</b> | -94.0781 |
|                            | 3  | 0.905 | <b>5</b>  | 59.82 | 42       | -79.243  |
|                            | 4  | 0.905 | <b>2</b>  | 63.3  | 63       | -76.7711 |
|                            | 5  | 0.898 | 16        | 53.23 | 22       | -85.789  |
|                            | 6  | 0.886 | 19        | 52.07 | <b>2</b> | -102.037 |
|                            | 7  | 0.877 | <b>6</b>  | 58.48 | 19       | -86.7354 |
|                            | 8  | 0.865 | <b>8</b>  | 57.09 | 16       | -87.847  |
|                            | 9  | 0.858 | <b>1</b>  | 65.57 | 32       | -81.8378 |
|                            | 10 | 0.857 | 28        | 48.02 | 278      | -61.7858 |
| ApikL2F-sHMA94<br>(7nmmDL) | 1  | 0.943 | <b>1</b>  | 70.17 | <b>3</b> | -100.989 |
|                            | 2  | 0.931 | <b>3</b>  | 61.26 | <b>1</b> | -104.301 |
|                            | 3  | 0.884 | 10        | 57.09 | 16       | -86.4131 |
|                            | 4  | 0.884 | <b>2</b>  | 65.3  | <b>2</b> | -103.054 |
|                            | 5  | 0.883 | <b>9</b>  | 57.22 | <b>8</b> | -92.0285 |
|                            | 6  | 0.873 | <b>4</b>  | 60.17 | 29       | -80.4307 |
|                            | 7  | 0.87  | 21        | 52.72 | 317      | -58.4078 |
|                            | 8  | 0.868 | <b>5</b>  | 58.63 | 13       | -87.9235 |
|                            | 9  | 0.86  | 33        | 48.14 | 1747     | -10.9675 |
|                            | 10 | 0.856 | 11        | 56.29 | 836      | -42.1599 |
| ApikL2F-sHMA94<br>(7nmmEM) | 1  | 0.922 | <b>8</b>  | 58.46 | 14       | -89.2384 |
|                            | 2  | 0.922 | 5         | 59.95 | 16       | -88.6768 |
|                            | 3  | 0.916 | <b>2</b>  | 61.64 | 56       | -80.4144 |
|                            | 4  | 0.903 | <b>6</b>  | 58.92 | <b>3</b> | -96.8506 |
|                            | 5  | 0.88  | <b>7</b>  | 58.79 | 382      | -61.876  |
|                            | 6  | 0.879 | 50        | 46.9  | 497      | -58.291  |
|                            | 7  | 0.872 | 16        | 52.24 | 134      | -73.4211 |
|                            | 8  | 0.87  | <b>3</b>  | 61.38 | 112      | -75.0739 |
|                            | 9  | 0.866 | <b>9</b>  | 56.45 | 312      | -64.4014 |
|                            | 10 | 0.864 | 12        | 54.21 | 262      | -66.4954 |
| ApikL2F-sHMA94<br>(7nmmFN) | 1  | 0.933 | <b>4</b>  | 61.17 | <b>1</b> | -107.157 |
|                            | 2  | 0.922 | <b>2</b>  | 64.53 | <b>8</b> | -88.8082 |
|                            | 3  | 0.915 | 7         | 59.99 | <b>2</b> | -104.589 |
|                            | 4  | 0.902 | <b>10</b> | 58.72 | <b>4</b> | -98.4579 |
|                            | 5  | 0.898 | <b>3</b>  | 64.2  | 17       | -84.5845 |
|                            | 6  | 0.88  | 29        | 52.57 | 56       | -77.5656 |
|                            | 7  | 0.874 | 20        | 55.39 | 185      | -66.7935 |

|                            |    |       |          |       |           |          |
|----------------------------|----|-------|----------|-------|-----------|----------|
|                            | 8  | 0.868 | 21       | 55.14 | <b>6</b>  | -89.579  |
|                            | 9  | 0.866 | <b>1</b> | 66.76 | 32        | -80.8245 |
|                            | 10 | 0.866 | 12       | 57.8  | 233       | -64.6182 |
| ApikL2F-sHMA94<br>(7nmmGO) | 1  | 0.941 | <b>2</b> | 64.19 | <b>4</b>  | -96.1059 |
|                            | 2  | 0.913 | <b>1</b> | 64.39 | <b>6</b>  | -93.2973 |
|                            | 3  | 0.91  | 11       | 54.59 | 15        | -86.9455 |
|                            | 4  | 0.905 | <b>8</b> | 57.64 | 34        | -82.0189 |
|                            | 5  | 0.901 | <b>3</b> | 60.89 | <b>1</b>  | -107.128 |
|                            | 6  | 0.898 | <b>4</b> | 60.83 | 85        | -73.1651 |
|                            | 7  | 0.873 | 26       | 50.55 | 440       | -55.2597 |
|                            | 8  | 0.862 | <b>7</b> | 59.06 | 26        | -84.1119 |
|                            | 9  | 0.861 | 353      | 41.62 | <b>3</b>  | -96.3148 |
|                            | 10 | 0.858 | 16       | 53.04 | 508       | -53.0032 |
| ApikL2F-sHMA94<br>(7nmmHP) | 1  | 0.914 | <b>8</b> | 57.23 | <b>10</b> | -91.2643 |
|                            | 2  | 0.911 | <b>9</b> | 56.77 | <b>9</b>  | -92.0384 |
|                            | 3  | 0.91  | <b>4</b> | 58.29 | 21        | -84.4108 |
|                            | 4  | 0.893 | <b>5</b> | 57.96 | 15        | -89.2407 |
|                            | 5  | 0.89  | <b>1</b> | 63.64 | <b>7</b>  | -93.1513 |
|                            | 6  | 0.884 | <b>7</b> | 57.27 | <b>2</b>  | -98.7045 |
|                            | 7  | 0.87  | 21       | 51.08 | 274       | -63.1149 |
|                            | 8  | 0.865 | 43       | 48.02 | 865       | -44.0054 |
|                            | 9  | 0.863 | 62       | 46.61 | 123       | -71.6632 |
|                            | 10 | 0.854 | <b>3</b> | 60.5  | 216       | -66.0752 |

**Table S3.** Rankings of the top 10 best ZDOCK score docking poses and corresponding rankings using ZRANK score. Rankings shown in bold font indicate a top-10 pose for the ZRANK scoring function.

| Effector-host<br>receptor binding<br>partner complex | ZDOCK<br>ranking | ZDOCK<br>score | ZRANK<br>ranking | ZRANK<br>score |
|------------------------------------------------------|------------------|----------------|------------------|----------------|
| Avr1CO39-RGA5<br>(5zngAC)                            | 1                | 46.35          | 1261             | -33.835        |
|                                                      | 2                | 45.52          | 1846             | -5.42654       |
|                                                      | 3                | 45             | 1181             | -36.3694       |
|                                                      | 4                | 44.56          | 82               | -69.8359       |
|                                                      | 5                | 44.41          | 1286             | -32.9555       |
|                                                      | 6                | 43.95          | 16               | -78.0114       |
|                                                      | 7                | 43.63          | 111              | -67.9328       |
|                                                      | 8                | 43.55          | 1546             | -23.3259       |
|                                                      | 9                | 43.37          | 577              | -51.716        |
|                                                      | 10               | 43.34          | <b>2</b>         | -87.4794       |
| AvrPia-PikpHMA<br>(6q76AB)                           | 1                | 43.46          | 70               | -73.1223       |
|                                                      | 2                | 43.26          | 125              | -68.2589       |

|                                 |    |       |           |          |
|---------------------------------|----|-------|-----------|----------|
|                                 | 3  | 42.47 | 212       | -64.0926 |
|                                 | 4  | 42.21 | 1685      | -19.1506 |
|                                 | 5  | 41.29 | 263       | -61.9065 |
|                                 | 6  | 41.09 | 1285      | -33.4787 |
|                                 | 7  | 41.08 | 233       | -63.227  |
|                                 | 8  | 41.01 | 54        | -74.507  |
|                                 | 9  | 40.87 | 1144      | -37.2376 |
|                                 | 10 | 40.8  | 121       | -68.4799 |
| AvrPikC-<br>PikhHMA<br>(7a8xBC) | 1  | 61.74 | 64        | -70.0846 |
|                                 | 2  | 60.16 | <b>1</b>  | -88.0183 |
|                                 | 3  | 59.74 | 922       | -38.9302 |
|                                 | 4  | 58.01 | <b>3</b>  | -85.0714 |
|                                 | 5  | 57.62 | 350       | -55.8018 |
|                                 | 6  | 57.58 | <b>4</b>  | -83.0148 |
|                                 | 7  | 56.96 | 1079      | -34.7113 |
|                                 | 8  | 55.18 | 326       | -56.894  |
|                                 | 9  | 54.67 | 43        | -72.5972 |
|                                 | 10 | 54.5  | 1096      | -34.3337 |
| AvrPikC-<br>PikhHMA<br>(7a8xEF) | 1  | 73.13 | 25        | -85.0809 |
|                                 | 2  | 69.6  | 22        | -85.3532 |
|                                 | 3  | 65.65 | <b>5</b>  | -102.248 |
|                                 | 4  | 62.24 | 11        | -90.3229 |
|                                 | 5  | 62.03 | 43        | -79.4627 |
|                                 | 6  | 61.31 | 14        | -88.0547 |
|                                 | 7  | 60.47 | <b>3</b>  | -105.705 |
|                                 | 8  | 60.38 | <b>1</b>  | -109.556 |
|                                 | 9  | 59.42 | 1900      | 10.94890 |
|                                 | 10 | 59.34 | <b>2</b>  | -108.377 |
| AvrPikD-<br>PikmHMA<br>(6fu9AB) | 1  | 69.34 | <b>1</b>  | -120.033 |
|                                 | 2  | 66.8  | 14        | -93.8471 |
|                                 | 3  | 66.11 | <b>2</b>  | -116.050 |
|                                 | 4  | 64.02 | <b>9</b>  | -99.9212 |
|                                 | 5  | 63.59 | <b>7</b>  | -100.641 |
|                                 | 6  | 62.86 | <b>8</b>  | -100.329 |
|                                 | 7  | 61.22 | <b>6</b>  | -102.831 |
|                                 | 8  | 60.01 | 227       | -70.3277 |
|                                 | 9  | 59.69 | 19        | -92.2094 |
|                                 | 10 | 59.45 | 177       | -72.4639 |
| AvrPikD-<br>PikmHMA<br>(6fu9CD) | 1  | 63.39 | <b>10</b> | -104.785 |
|                                 | 2  | 62.8  | <b>9</b>  | -104.797 |
|                                 | 3  | 62.21 | 14        | -100.436 |
|                                 | 4  | 61.31 | <b>2</b>  | -111.478 |
|                                 | 5  | 60.53 | <b>1</b>  | -129.325 |

|                                 |    |       |          |          |
|---------------------------------|----|-------|----------|----------|
|                                 | 6  | 58.13 | 31       | -92.6532 |
|                                 | 7  | 57.68 | 396      | -61.5577 |
|                                 | 8  | 57.54 | 38       | -90.1360 |
|                                 | 9  | 57.36 | 1095     | -40.2118 |
|                                 | 10 | 57.31 | 39       | -89.5434 |
| AvrPikE-PikmHMA<br>(6fubAB)     | 1  | 64.49 | 94       | -76.1576 |
|                                 | 2  | 60.03 | <b>2</b> | -103.783 |
|                                 | 3  | 59.47 | 64       | -79.4466 |
|                                 | 4  | 58.9  | 15       | -90.3050 |
|                                 | 5  | 57.28 | 28       | -85.7743 |
|                                 | 6  | 56.82 | 1084     | -42.5602 |
|                                 | 7  | 56.65 | 22       | -88.2068 |
|                                 | 8  | 56.06 | 698      | -51.7930 |
|                                 | 9  | 55.74 | 34       | -83.4692 |
|                                 | 10 | 55.55 | 73       | -78.3791 |
| AvrPikE-PikpHMA<br>(6g11BC)     | 1  | 65.69 | <b>2</b> | -98.6024 |
|                                 | 2  | 64.4  | 23       | -77.5488 |
|                                 | 3  | 62.15 | <b>1</b> | -110.703 |
|                                 | 4  | 60.62 | <b>3</b> | -95.3788 |
|                                 | 5  | 60.16 | 65       | -71.5955 |
|                                 | 6  | 58.87 | <b>5</b> | -88.5445 |
|                                 | 7  | 58.64 | 78       | -70.1489 |
|                                 | 8  | 58.48 | 75       | -70.9139 |
|                                 | 9  | 58.04 | 190      | -62.1193 |
|                                 | 10 | 57.82 | 251      | -59.3259 |
| AvrPikE-PikpHMA<br>(6g11EF)     | 1  | 62.28 | 853      | -42.1942 |
|                                 | 2  | 60.49 | 12       | -81.8776 |
|                                 | 3  | 59.73 | <b>6</b> | -84.8633 |
|                                 | 4  | 58.82 | 22       | -79.1564 |
|                                 | 5  | 58.55 | 175      | -63.8927 |
|                                 | 6  | 58.05 | <b>1</b> | -96.3179 |
|                                 | 7  | 57.9  | 214      | -61.6217 |
|                                 | 8  | 55.95 | 143      | -65.2232 |
|                                 | 9  | 55.12 | 76       | -70.4429 |
|                                 | 10 | 54.72 | 43       | -74.0056 |
| AvrPikE-PikpHMA<br>mut (6r8mFG) | 1  | 67.9  | <b>2</b> | -102.771 |
|                                 | 2  | 63.82 | 254      | -61.0644 |
|                                 | 3  | 62.3  | 33       | -78.3967 |
|                                 | 4  | 61.54 | 63       | -72.5668 |
|                                 | 5  | 59.85 | <b>7</b> | -88.5242 |
|                                 | 6  | 59.17 | 453      | -54.0219 |
|                                 | 7  | 58.72 | <b>3</b> | -91.6427 |
|                                 | 8  | 58.28 | 43       | -76.0868 |

|                                 |    |       |           |          |
|---------------------------------|----|-------|-----------|----------|
|                                 | 9  | 57.54 | 1369      | -27.2931 |
|                                 | 10 | 56.21 | 768       | -44.7472 |
| AvrPikF-<br>OsHIP19<br>(7b11BC) | 1  | 75.98 | <b>3</b>  | -111.826 |
|                                 | 2  | 72.73 | <b>8</b>  | -95.1279 |
|                                 | 3  | 72.57 | 88        | -67.3141 |
|                                 | 4  | 70.92 | <b>1</b>  | -125.125 |
|                                 | 5  | 69.6  | <b>4</b>  | -105.916 |
|                                 | 6  | 68.84 | <b>6</b>  | -97.2762 |
|                                 | 7  | 65.45 | <b>10</b> | -90.3786 |
|                                 | 8  | 65.44 | 14        | -87.9087 |
|                                 | 9  | 63.75 | 94        | -66.7719 |
|                                 | 10 | 62.9  | <b>2</b>  | -112.413 |
| ApikL2F-sHMA94<br>(7nmmAI)      | 1  | 68.51 | <b>9</b>  | -91.4234 |
|                                 | 2  | 63.37 | 290       | -63.4232 |
|                                 | 3  | 62.99 | <b>1</b>  | -103.174 |
|                                 | 4  | 61.76 | 123       | -71.6120 |
|                                 | 5  | 59.76 | 621       | -51.5530 |
|                                 | 6  | 59.51 | 106       | -73.1485 |
|                                 | 7  | 57.68 | 616       | -51.7256 |
|                                 | 8  | 56.23 | 182       | -68.1792 |
|                                 | 9  | 56.02 | 178       | -68.4282 |
|                                 | 10 | 55.94 | 346       | -61.0129 |
| ApikL2F-sHMA94<br>(7nmmBJ)      | 1  | 59.6  | 121       | -74.7666 |
|                                 | 2  | 58.69 | 102       | -75.7036 |
|                                 | 3  | 58.31 | <b>9</b>  | -93.9556 |
|                                 | 4  | 57.62 | 159       | -72.0868 |
|                                 | 5  | 57.52 | 702       | -49.6216 |
|                                 | 6  | 57.21 | <b>5</b>  | -96.3640 |
|                                 | 7  | 55.59 | 116       | -75.0624 |
|                                 | 8  | 55.53 | 21        | -88.9538 |
|                                 | 9  | 55.13 | 461       | -57.6184 |
|                                 | 10 | 55.13 | 1181      | -34.8999 |
| ApikL2F-sHMA94<br>(7nmmCK)      | 1  | 65.57 | 32        | -81.8378 |
|                                 | 2  | 63.3  | 63        | -76.7711 |
|                                 | 3  | 61.34 | 14        | -88.5095 |
|                                 | 4  | 60.91 | <b>5</b>  | -94.0781 |
|                                 | 5  | 59.82 | 42        | -79.2430 |
|                                 | 6  | 58.48 | 19        | -86.7354 |
|                                 | 7  | 57.27 | 339       | -58.4822 |
|                                 | 8  | 57.09 | 16        | -87.8470 |
|                                 | 9  | 56.93 | 179       | -66.8267 |
|                                 | 10 | 56.02 | 13        | -88.5285 |
|                                 | 1  | 70.17 | <b>3</b>  | -100.989 |

|                           |    |       |          |          |
|---------------------------|----|-------|----------|----------|
| ApikL2F-sHMA94<br>(7nmDL) | 2  | 65.3  | <b>2</b> | -103.054 |
|                           | 3  | 61.26 | <b>1</b> | -104.301 |
|                           | 4  | 60.17 | 29       | -80.4307 |
|                           | 5  | 58.63 | 13       | -87.9235 |
|                           | 6  | 57.91 | 1126     | -34.4374 |
|                           | 7  | 57.83 | 60       | -74.9995 |
|                           | 8  | 57.55 | 31       | -79.9196 |
|                           | 9  | 57.22 | <b>8</b> | -92.0285 |
|                           | 10 | 57.09 | 16       | -86.4131 |
| ApikL2F-sHMA94<br>(7nmEM) | 1  | 62.04 | 888      | -47.3998 |
|                           | 2  | 61.64 | 56       | -80.4144 |
|                           | 3  | 61.38 | 112      | -75.0739 |
|                           | 4  | 61.2  | 36       | -82.9554 |
|                           | 5  | 59.95 | 16       | -88.6768 |
|                           | 6  | 58.92 | <b>3</b> | -96.8506 |
|                           | 7  | 58.79 | 382      | -61.8760 |
|                           | 8  | 58.46 | 14       | -89.2384 |
|                           | 9  | 56.45 | 312      | -64.4014 |
|                           | 10 | 54.53 | 292      | -65.0592 |
| ApikL2F-sHMA94<br>(7nmFN) | 1  | 66.76 | 32       | -80.8245 |
|                           | 2  | 64.53 | <b>8</b> | -88.8082 |
|                           | 3  | 64.2  | 17       | -84.5845 |
|                           | 4  | 61.17 | <b>1</b> | -107.157 |
|                           | 5  | 61.13 | 1574     | -18.5380 |
|                           | 6  | 60.41 | 100      | -72.6072 |
|                           | 7  | 59.99 | <b>2</b> | -104.589 |
|                           | 8  | 59.77 | 344      | -60.0000 |
|                           | 9  | 58.97 | 64       | -75.9239 |
|                           | 10 | 58.72 | <b>4</b> | -98.4579 |
| ApikL2F-sHMA94<br>(7nmGO) | 1  | 64.39 | <b>6</b> | -93.2973 |
|                           | 2  | 64.19 | <b>4</b> | -96.1059 |
|                           | 3  | 60.89 | <b>1</b> | -107.128 |
|                           | 4  | 60.83 | 85       | -73.1651 |
|                           | 5  | 59.7  | 388      | -56.9657 |
|                           | 6  | 59.64 | 222      | -63.7676 |
|                           | 7  | 59.06 | 26       | -84.1119 |
|                           | 8  | 57.64 | 34       | -82.0189 |
|                           | 9  | 57.32 | 181      | -65.6973 |
|                           | 10 | 55.43 | 158      | -66.9573 |
| ApikL2F-sHMA94<br>(7nmHP) | 1  | 63.64 | <b>7</b> | -93.1513 |
|                           | 2  | 60.83 | 13       | -90.0223 |
|                           | 3  | 60.5  | 216      | -66.0752 |
|                           | 4  | 58.29 | 21       | -84.4108 |

|  |    |       |           |          |
|--|----|-------|-----------|----------|
|  | 5  | 57.96 | 15        | -89.2407 |
|  | 6  | 57.51 | 658       | -50.6394 |
|  | 7  | 57.27 | <b>2</b>  | -98.7045 |
|  | 8  | 57.23 | <b>10</b> | -91.2643 |
|  | 9  | 56.77 | <b>9</b>  | -92.0384 |
|  | 10 | 56.68 | 1582      | -19.0348 |

**Table S4.** Rankings of the top 15 best ZRANK score docking poses and corresponding rankings based on ZDOCK and DockQ score. Docking poses with DockQ score above 0.8 are highlighted in bold, and docking poses omitted during application of residue restraints are shown in red font and italicised.

| Effector-host receptor binding partner complex | ZRANK ranking | ZRANK score     | ZDOCK ranking | ZDOCK score  | DockQ ranking | DockQ score  |
|------------------------------------------------|---------------|-----------------|---------------|--------------|---------------|--------------|
| Avr1CO39-RGA5 (5zngAC)                         | 1             | -89.5292        | 43            | 39.69        | 8             | 0.912        |
|                                                | 2             | -87.4794        | 10            | 43.34        | 59            | 0.655        |
|                                                | 3             | -86.2310        | 66            | 38.77        | 50            | 0.696        |
|                                                | 4             | -85.0222        | 198           | 36.81        | 689           | 0.079        |
|                                                | 5             | -84.5496        | 114           | 37.75        | 44            | 0.731        |
|                                                | <i>6</i>      | <i>-83.1375</i> | <i>51</i>     | <i>39.08</i> | <i>793</i>    | <i>0.070</i> |
|                                                | 7             | -82.4553        | 438           | 35.27        | 91            | 0.511        |
|                                                | 8             | -82.3644        | 1817          | 32.43        | 102           | 0.451        |
|                                                | 9             | -82.1716        | 279           | 36.14        | 72            | 0.594        |
|                                                | <i>10</i>     | <i>-81.7161</i> | <i>787</i>    | <i>34.11</i> | <i>573</i>    | <i>0.086</i> |
|                                                | 11            | -81.3406        | 734           | 34.25        | 39            | 0.753        |
|                                                | <b>12</b>     | <b>-79.4734</b> | <b>103</b>    | <b>38.01</b> | <b>29</b>     | <b>0.807</b> |
|                                                | <i>13</i>     | <i>-79.4532</i> | <i>1747</i>   | <i>32.52</i> | <i>251</i>    | <i>0.130</i> |
|                                                | 14            | -79.1197        | 42            | 39.92        | 56            | 0.675        |
|                                                | <i>15</i>     | <i>-78.8399</i> | <i>1323</i>   | <i>33.09</i> | <i>257</i>    | <i>0.129</i> |
| AvrPia-PikpHMA (6q76AB)                        | <i>1</i>      | <i>-95.9139</i> | <i>21</i>     | <i>40.07</i> | <i>204</i>    | <i>0.240</i> |
|                                                | 2             | -91.2624        | 232           | 36.15        | 39            | 0.692        |
|                                                | <i>3</i>      | <i>-89.1110</i> | <i>43</i>     | <i>39.15</i> | <i>1677</i>   | <i>0.023</i> |
|                                                | <i>4</i>      | <i>-88.7483</i> | <i>26</i>     | <i>39.91</i> | <i>845</i>    | <i>0.061</i> |
|                                                | 5             | -87.7190        | 276           | 35.75        | 94            | 0.419        |
|                                                | <i>6</i>      | <i>-86.4957</i> | <i>52</i>     | <i>38.84</i> | <i>1600</i>   | <i>0.024</i> |
|                                                | 7             | -86.3842        | 83            | 38.11        | 54            | 0.597        |
|                                                | <b>8</b>      | <b>-85.9788</b> | <b>579</b>    | <b>34.09</b> | <b>25</b>     | <b>0.821</b> |
|                                                | <i>9</i>      | <i>-84.8230</i> | <i>51</i>     | <i>38.87</i> | <i>843</i>    | <i>0.061</i> |
|                                                | 10            | -84.7666        | 344           | 35.21        | 62            | 0.560        |
|                                                | <i>11</i>     | <i>-84.6149</i> | <i>46</i>     | <i>39.02</i> | <i>1601</i>   | <i>0.024</i> |

|                             |    |           |      |       |      |       |
|-----------------------------|----|-----------|------|-------|------|-------|
|                             | 12 | -83.7763  | 60   | 38.61 | 178  | 0.255 |
|                             | 13 | -83.7379  | 1852 | 31.68 | 41   | 0.674 |
|                             | 14 | -83.6471  | 533  | 34.31 | 777  | 0.065 |
|                             | 15 | -83.0385  | 105  | 37.69 | 842  | 0.061 |
| AvrPikC-PikhHMA<br>(7a8xBC) | 1  | -88.0183  | 2    | 60.16 | 1    | 0.917 |
|                             | 2  | -86.0303  | 20   | 49.02 | 18   | 0.808 |
|                             | 3  | -85.0714  | 4    | 58.01 | 21   | 0.802 |
|                             | 4  | -83.0148  | 6    | 57.58 | 8    | 0.878 |
|                             | 5  | -82.1053  | 286  | 39.52 | 685  | 0.072 |
|                             | 6  | -81.7334  | 1139 | 35.9  | 163  | 0.314 |
|                             | 7  | -81.7011  | 295  | 39.46 | 45   | 0.716 |
|                             | 8  | -81.6544  | 40   | 45.74 | 1858 | 0.017 |
|                             | 9  | -81.6427  | 230  | 40.15 | 1644 | 0.018 |
|                             | 10 | -81.6281  | 165  | 41.1  | 106  | 0.562 |
|                             | 11 | -80.7621  | 42   | 45.4  | 40   | 0.745 |
|                             | 12 | -80.6936  | 305  | 39.38 | 331  | 0.102 |
|                             | 13 | -79.7873  | 11   | 53.75 | 3    | 0.888 |
|                             | 14 | -79.3699  | 15   | 50.72 | 10   | 0.871 |
|                             | 15 | -79.2047  | 31   | 47.28 | 25   | 0.788 |
| AvrPikC-PikhHMA<br>(7a8xEF) | 1  | -109.5560 | 8    | 60.38 | 4    | 0.904 |
|                             | 2  | -108.3770 | 10   | 59.34 | 16   | 0.831 |
|                             | 3  | -105.7050 | 7    | 60.47 | 19   | 0.828 |
|                             | 4  | -102.3670 | 76   | 47.7  | 43   | 0.731 |
|                             | 5  | -102.2480 | 3    | 65.65 | 14   | 0.846 |
|                             | 6  | -95.5699  | 50   | 49.58 | 912  | 0.061 |
|                             | 7  | -93.1446  | 98   | 46.27 | 23   | 0.818 |
|                             | 8  | -92.0097  | 46   | 49.91 | 29   | 0.784 |
|                             | 9  | -91.7464  | 124  | 45.33 | 52   | 0.712 |
|                             | 10 | -91.1429  | 14   | 58.45 | 11   | 0.854 |
|                             | 11 | -90.3229  | 4    | 62.24 | 5    | 0.888 |
|                             | 12 | -90.2887  | 48   | 49.69 | 766  | 0.070 |
|                             | 13 | -88.6367  | 21   | 54.18 | 375  | 0.103 |
|                             | 14 | -88.0547  | 6    | 61.31 | 24   | 0.813 |
|                             | 15 | -87.4388  | 29   | 51.88 | 49   | 0.716 |
| AvrPikD-PikmHMA<br>(6fu9AB) | 1  | -120.0330 | 1    | 69.34 | 13   | 0.833 |
|                             | 2  | -116.0500 | 3    | 66.11 | 8    | 0.871 |
|                             | 3  | -106.4060 | 13   | 58.59 | 54   | 0.702 |
|                             | 4  | -104.8450 | 29   | 52.52 | 49   | 0.717 |
|                             | 5  | -104.3320 | 141  | 44.31 | 349  | 0.119 |
|                             | 6  | -102.8310 | 7    | 61.22 | 22   | 0.808 |
|                             | 7  | -100.6410 | 5    | 63.59 | 2    | 0.900 |
|                             | 8  | -100.3290 | 6    | 62.86 | 4    | 0.887 |
|                             | 9  | -99.9212  | 4    | 64.02 | 6    | 0.883 |



|                                 |           |                  |             |              |             |              |
|---------------------------------|-----------|------------------|-------------|--------------|-------------|--------------|
|                                 | <i>10</i> | <i>-99.6194</i>  | <i>188</i>  | <i>42.93</i> | <i>369</i>  | <i>0.112</i> |
|                                 | 11        | -99.2636         | 74          | 47.57        | 27          | 0.777        |
|                                 | <i>12</i> | <i>-97.7333</i>  | <i>931</i>  | <i>36.94</i> | <i>333</i>  | <i>0.133</i> |
|                                 | <i>13</i> | <i>-94.7468</i>  | <i>163</i>  | <i>43.54</i> | <i>358</i>  | <i>0.116</i> |
|                                 | <b>14</b> | <b>-93.8471</b>  | <b>2</b>    | <b>66.8</b>  | <b>12</b>   | <b>0.837</b> |
|                                 | <i>15</i> | <i>-93.2170</i>  | <i>364</i>  | <i>40.06</i> | <i>598</i>  | <i>0.089</i> |
| AvrPikD-<br>PikmHMA<br>(6fu9CD) | <i>1</i>  | <i>-129.3250</i> | <i>5</i>    | <i>60.53</i> | <i>296</i>  | <i>0.120</i> |
|                                 | <b>2</b>  | <b>-111.4780</b> | <b>4</b>    | <b>61.31</b> | <b>4</b>    | <b>0.910</b> |
|                                 | <b>3</b>  | <b>-110.1160</b> | <b>13</b>   | <b>55.59</b> | <b>6</b>    | <b>0.895</b> |
|                                 | <i>4</i>  | <i>-109.7180</i> | <i>35</i>   | <i>51.48</i> | <i>302</i>  | <i>0.119</i> |
|                                 | <b>5</b>  | <b>-109.2430</b> | <b>41</b>   | <b>51.17</b> | <b>14</b>   | <b>0.842</b> |
|                                 | <i>6</i>  | <i>-107.6510</i> | <i>18</i>   | <i>54.08</i> | <i>322</i>  | <i>0.115</i> |
|                                 | <i>7</i>  | <i>-107.3680</i> | <i>57</i>   | <i>49.79</i> | <i>316</i>  | <i>0.116</i> |
|                                 | <i>8</i>  | <i>-105.6560</i> | <i>105</i>  | <i>47.38</i> | <i>499</i>  | <i>0.096</i> |
|                                 | <b>9</b>  | <b>-104.7970</b> | <b>2</b>    | <b>62.8</b>  | <b>3</b>    | <b>0.910</b> |
|                                 | <b>10</b> | <b>-104.7850</b> | <b>1</b>    | <b>63.39</b> | <b>2</b>    | <b>0.915</b> |
|                                 | <i>11</i> | <i>-103.2640</i> | <i>1074</i> | <i>38.21</i> | <i>1380</i> | <i>0.023</i> |
|                                 | <i>12</i> | <i>-103.0090</i> | <i>89</i>   | <i>47.97</i> | <i>345</i>  | <i>0.111</i> |
|                                 | <i>13</i> | <i>-101.9700</i> | <i>126</i>  | <i>46.45</i> | <i>364</i>  | <i>0.108</i> |
|                                 | <b>14</b> | <b>-100.4360</b> | <b>3</b>    | <b>62.21</b> | <b>1</b>    | <b>0.941</b> |
|                                 | <i>15</i> | <i>-99.8241</i>  | <i>394</i>  | <i>41.88</i> | <i>999</i>  | <i>0.056</i> |
| AvrPikE-<br>PikmHMA<br>(6fubAB) | 1         | -106.1790        | 554         | 39.73        | 239         | 0.162        |
|                                 | <b>2</b>  | <b>-103.7830</b> | <b>2</b>    | <b>60.03</b> | <b>13</b>   | <b>0.838</b> |
|                                 | <b>3</b>  | <b>-102.6020</b> | <b>13</b>   | <b>53.73</b> | <b>4</b>    | <b>0.879</b> |
|                                 | <i>4</i>  | <i>-98.0256</i>  | <i>239</i>  | <i>42.3</i>  | <i>1180</i> | <i>0.019</i> |
|                                 | <i>5</i>  | <i>-97.5260</i>  | <i>127</i>  | <i>44.35</i> | <i>177</i>  | <i>0.231</i> |
|                                 | <i>6</i>  | <i>-95.8269</i>  | <i>94</i>   | <i>45.51</i> | <i>191</i>  | <i>0.208</i> |
|                                 | <i>7</i>  | <i>-94.2026</i>  | <i>130</i>  | <i>44.27</i> | <i>358</i>  | <i>0.095</i> |
|                                 | <i>8</i>  | <i>-93.5791</i>  | <i>39</i>   | <i>48.71</i> | <i>180</i>  | <i>0.223</i> |
|                                 | <i>9</i>  | <i>-93.4517</i>  | <i>1069</i> | <i>37.91</i> | <i>76</i>   | <i>0.609</i> |
|                                 | <i>10</i> | <i>-92.3534</i>  | <i>628</i>  | <i>39.35</i> | <i>1311</i> | <i>0.018</i> |
|                                 | <i>11</i> | <i>-91.8758</i>  | <i>479</i>  | <i>40.13</i> | <i>186</i>  | <i>0.210</i> |
|                                 | <i>12</i> | <i>-91.4581</i>  | <i>473</i>  | <i>40.19</i> | <i>536</i>  | <i>0.075</i> |
|                                 | <i>13</i> | <i>-91.4434</i>  | <i>177</i>  | <i>43.51</i> | <i>283</i>  | <i>0.119</i> |
|                                 | 14        | -90.7172         | 26          | 50.08        | 22          | 0.798        |
|                                 | <b>15</b> | <b>-90.3050</b>  | <b>4</b>    | <b>58.9</b>  | <b>1</b>    | <b>0.935</b> |
| AvrPikE-<br>PikpHMA<br>(6g11BC) | <b>1</b>  | <b>-110.7030</b> | <b>3</b>    | <b>62.15</b> | <b>4</b>    | <b>0.892</b> |
|                                 | <b>2</b>  | <b>-98.6024</b>  | <b>1</b>    | <b>65.69</b> | <b>5</b>    | <b>0.885</b> |
|                                 | <b>3</b>  | <b>-95.3788</b>  | <b>4</b>    | <b>60.62</b> | <b>6</b>    | <b>0.884</b> |
|                                 | <b>4</b>  | <b>-94.4781</b>  | <b>16</b>   | <b>55.34</b> | <b>8</b>    | <b>0.865</b> |
|                                 | <b>5</b>  | <b>-88.5445</b>  | <b>6</b>    | <b>58.87</b> | <b>14</b>   | <b>0.834</b> |
|                                 | <b>6</b>  | <b>-88.4164</b>  | <b>27</b>   | <b>51.3</b>  | <b>9</b>    | <b>0.864</b> |
|                                 | <i>7</i>  | <i>-88.2260</i>  | <i>794</i>  | <i>38.08</i> | <i>1613</i> | <i>0.018</i> |

|                                     |    |                  |           |              |           |              |
|-------------------------------------|----|------------------|-----------|--------------|-----------|--------------|
|                                     | 8  | -86.0721         | 500       | 39.52        | 77        | 0.640        |
|                                     | 9  | -85.0710         | 799       | 38.07        | 606       | 0.090        |
|                                     | 10 | -84.8220         | 135       | 44.19        | 1977      | 0.015        |
|                                     | 11 | -84.7155         | 17        | 55.11        | 37        | 0.743        |
|                                     | 12 | -84.6581         | 522       | 39.44        | 860       | 0.067        |
|                                     | 13 | -84.1951         | 34        | 50.42        | 1984      | 0.015        |
|                                     | 14 | -83.2916         | 1100      | 37.06        | 613       | 0.089        |
|                                     | 15 | -82.2992         | 138       | 44.14        | 535       | 0.096        |
| AvrPikE-<br>PikpHMA<br>(6g11EF)     | 1  | <b>-96.3179</b>  | <b>6</b>  | <b>58.05</b> | <b>6</b>  | <b>0.875</b> |
|                                     | 2  | <b>-93.2629</b>  | <b>16</b> | <b>52.35</b> | <b>4</b>  | <b>0.893</b> |
|                                     | 3  | -93.0332         | 677       | 38.62        | 1754      | 0.017        |
|                                     | 4  | -89.4946         | 143       | 43.33        | 576       | 0.093        |
|                                     | 5  | -88.4454         | 755       | 38.35        | 251       | 0.136        |
|                                     | 6  | <b>-84.8633</b>  | <b>3</b>  | <b>59.73</b> | <b>8</b>  | <b>0.865</b> |
|                                     | 7  | <b>-83.8453</b>  | <b>19</b> | <b>51.26</b> | <b>7</b>  | <b>0.869</b> |
|                                     | 8  | -83.0799         | 365       | 40.51        | 159       | 0.335        |
|                                     | 9  | -83.0183         | 496       | 39.55        | 622       | 0.089        |
|                                     | 10 | -82.0344         | 1635      | 36.03        | 96        | 0.580        |
|                                     | 11 | -81.8788         | 277       | 41.23        | 603       | 0.091        |
|                                     | 12 | <b>-81.8776</b>  | <b>2</b>  | <b>60.49</b> | <b>5</b>  | <b>0.879</b> |
|                                     | 13 | -81.5497         | 264       | 41.36        | 832       | 0.069        |
|                                     | 14 | -81.3722         | 616       | 38.92        | 829       | 0.069        |
|                                     | 15 | -81.2861         | 353       | 40.57        | 757       | 0.076        |
| AvrPikE-<br>PikpHMA mut<br>(6r8mFG) | 1  | <b>-112.6550</b> | <b>30</b> | <b>50.5</b>  | <b>13</b> | <b>0.807</b> |
|                                     | 2  | <b>-102.7710</b> | <b>1</b>  | <b>67.9</b>  | <b>2</b>  | <b>0.901</b> |
|                                     | 3  | -91.6427         | 7         | 58.72        | 34        | 0.733        |
|                                     | 4  | -89.3933         | 661       | 37.55        | 940       | 0.055        |
|                                     | 5  | -88.8784         | 607       | 37.88        | 66        | 0.664        |
|                                     | 6  | -88.5705         | 17        | 54.35        | 27        | 0.769        |
|                                     | 7  | <b>-88.5242</b>  | <b>5</b>  | <b>59.85</b> | <b>3</b>  | <b>0.871</b> |
|                                     | 8  | -87.9761         | 498       | 38.44        | 149       | 0.464        |
|                                     | 9  | -86.6719         | 74        | 45.13        | 152       | 0.457        |
|                                     | 10 | -86.5235         | 14        | 54.55        | 39        | 0.713        |
|                                     | 11 | -86.3998         | 585       | 37.96        | 234       | 0.151        |
|                                     | 12 | -86.1257         | 490       | 38.47        | 332       | 0.105        |
|                                     | 13 | -84.9338         | 116       | 43           | 64        | 0.667        |
|                                     | 14 | -84.8296         | 158       | 41.96        | 327       | 0.106        |
|                                     | 15 | -84.8253         | 769       | 37.16        | 296       | 0.110        |
| AvrPikF-<br>OsHIP19<br>(7b11BC)     | 1  | <b>-125.1250</b> | <b>4</b>  | <b>70.92</b> | <b>10</b> | <b>0.880</b> |
|                                     | 2  | <b>-112.4130</b> | <b>10</b> | <b>62.9</b>  | <b>17</b> | <b>0.839</b> |
|                                     | 3  | <b>-111.8260</b> | <b>1</b>  | <b>75.98</b> | <b>8</b>  | <b>0.887</b> |
|                                     | 4  | <b>-105.9160</b> | <b>5</b>  | <b>69.6</b>  | <b>11</b> | <b>0.876</b> |
|                                     | 5  | <b>-99.3500</b>  | <b>20</b> | <b>58.62</b> | <b>13</b> | <b>0.851</b> |

|                           |           |                  |           |              |           |              |
|---------------------------|-----------|------------------|-----------|--------------|-----------|--------------|
|                           | <b>6</b>  | <b>-97.2762</b>  | <b>6</b>  | <b>68.84</b> | <b>6</b>  | <b>0.899</b> |
|                           | <b>7</b>  | <b>-96.2969</b>  | <b>18</b> | <b>60.01</b> | <b>21</b> | <b>0.824</b> |
|                           | <b>8</b>  | <b>-95.1279</b>  | <b>2</b>  | <b>72.73</b> | <b>4</b>  | <b>0.914</b> |
|                           | <b>9</b>  | <b>-94.1515</b>  | <b>12</b> | <b>61.17</b> | <b>3</b>  | <b>0.914</b> |
|                           | <b>10</b> | <b>-90.3786</b>  | <b>7</b>  | <b>65.45</b> | <b>9</b>  | <b>0.885</b> |
|                           | 11        | -89.4731         | 28        | 53.42        | 44        | 0.749        |
|                           | 12        | -89.3410         | 31        | 53.08        | 34        | 0.776        |
|                           | 13        | -88.8375         | 32        | 52.59        | 50        | 0.740        |
|                           | <b>14</b> | <b>-87.9087</b>  | <b>8</b>  | <b>65.44</b> | <b>7</b>  | <b>0.887</b> |
|                           | 15        | -87.7319         | 38        | 51.26        | 32        | 0.789        |
| pikL2A-sHMA94<br>(7nmmAI) | <b>1</b>  | <b>-103.1740</b> | <b>3</b>  | <b>62.99</b> | <b>1</b>  | <b>0.952</b> |
|                           | 2         | -98.5421         | 58        | 45.42        | 454       | 0.065        |
|                           | 3         | -98.3968         | 1279      | 37.46        | 130       | 0.233        |
|                           | <b>4</b>  | <b>-97.8778</b>  | <b>12</b> | <b>53.89</b> | <b>7</b>  | <b>0.870</b> |
|                           | 5         | -96.3848         | 389       | 40.3         | 74        | 0.641        |
|                           | 6         | -92.4402         | 53        | 45.8         | 466       | 0.064        |
|                           | 7         | -91.9992         | 174       | 42.11        | 518       | 0.060        |
|                           | 8         | -91.7799         | 909       | 38.35        | 656       | 0.050        |
|                           | <b>9</b>  | <b>-91.4234</b>  | <b>1</b>  | <b>68.51</b> | <b>2</b>  | <b>0.922</b> |
|                           | 10        | -90.9236         | 739       | 38.79        | 424       | 0.068        |
|                           | 11        | -90.4663         | 120       | 43.26        | 1741      | 0.018        |
|                           | 12        | -90.4247         | 869       | 38.47        | 371       | 0.073        |
|                           | 13        | -90.1579         | 64        | 44.98        | 498       | 0.062        |
|                           | 14        | -89.9620         | 1527      | 37.09        | 313       | 0.078        |
|                           | 15        | -87.8101         | 229       | 41.46        | 587       | 0.056        |
| pikL2A-sHMA94<br>(7nmmBJ) | <b>1</b>  | <b>-102.4800</b> | <b>12</b> | <b>53.48</b> | <b>1</b>  | <b>0.940</b> |
|                           | 2         | -98.5070         | 1306      | 36.14        | 259       | 0.089        |
|                           | 3         | -97.9469         | 896       | 37.17        | 554       | 0.061        |
|                           | 4         | -96.5826         | 27        | 49.41        | 1805      | 0.017        |
|                           | <b>5</b>  | <b>-96.3640</b>  | <b>6</b>  | <b>57.21</b> | <b>13</b> | <b>0.848</b> |
|                           | 6         | -94.7932         | 618       | 38.17        | 381       | 0.079        |
|                           | 7         | -94.1881         | 799       | 37.49        | 143       | 0.307        |
|                           | 8         | -94.0107         | 641       | 38.06        | 603       | 0.058        |
|                           | <b>9</b>  | <b>-93.9556</b>  | <b>3</b>  | <b>58.31</b> | <b>6</b>  | <b>0.886</b> |
|                           | 10        | -92.9697         | 1851      | 35.23        | 510       | 0.065        |
|                           | 11        | -92.4721         | 80        | 44.67        | 607       | 0.058        |
|                           | 12        | -92.1951         | 1809      | 35.3         | 168       | 0.225        |
|                           | 13        | -91.4489         | 634       | 38.09        | 573       | 0.060        |
|                           | 14        | -90.0133         | 289       | 40.69        | 643       | 0.056        |
|                           | 15        | -89.8092         | 1966      | 35.09        | 221       | 0.095        |
| pikL2A-sHMA94<br>(7nmmCK) | <b>1</b>  | <b>-102.3810</b> | <b>20</b> | <b>51.91</b> | <b>15</b> | <b>0.834</b> |
|                           | <b>2</b>  | <b>-102.0370</b> | <b>19</b> | <b>52.07</b> | <b>6</b>  | <b>0.886</b> |
|                           | 3         | -101.8300        | 577       | 39.18        | 80        | 0.642        |

|                          |           |                  |             |              |             |              |
|--------------------------|-----------|------------------|-------------|--------------|-------------|--------------|
|                          | <i>4</i>  | <i>-96.5480</i>  | <i>283</i>  | <i>40.81</i> | <i>440</i>  | <i>0.070</i> |
|                          | <b>5</b>  | <b>-94.0781</b>  | <b>4</b>    | <b>60.91</b> | <b>2</b>    | <b>0.911</b> |
|                          | <i>6</i>  | <i>-93.3125</i>  | <i>147</i>  | <i>42.35</i> | <i>483</i>  | <i>0.064</i> |
|                          | <i>7</i>  | <i>-92.2864</i>  | <i>730</i>  | <i>38.61</i> | <i>438</i>  | <i>0.070</i> |
|                          | <i>8</i>  | <i>-91.2961</i>  | <i>1674</i> | <i>36.43</i> | <i>435</i>  | <i>0.070</i> |
|                          | <i>9</i>  | <i>-90.9599</i>  | <i>1695</i> | <i>36.4</i>  | <i>484</i>  | <i>0.063</i> |
|                          | <i>10</i> | <i>-90.9374</i>  | <i>97</i>   | <i>43.48</i> | <i>524</i>  | <i>0.060</i> |
|                          | <i>11</i> | <i>-89.8206</i>  | <i>323</i>  | <i>40.54</i> | <i>361</i>  | <i>0.081</i> |
|                          | <i>12</i> | <i>-88.5927</i>  | <i>866</i>  | <i>38.15</i> | <i>965</i>  | <i>0.032</i> |
|                          | <b>13</b> | <b>-88.5285</b>  | <b>10</b>   | <b>56.02</b> | <b>13</b>   | <b>0.843</b> |
|                          | <b>14</b> | <b>-88.5095</b>  | <b>3</b>    | <b>61.34</b> | <b>1</b>    | <b>0.933</b> |
|                          | <i>15</i> | <i>-88.0200</i>  | <i>174</i>  | <i>42.02</i> | <i>44</i>   | <i>0.745</i> |
| pikL2A-sHMA94<br>(7nmDL) | <b>1</b>  | <b>-104.3010</b> | <b>3</b>    | <b>61.26</b> | <b>2</b>    | <b>0.931</b> |
|                          | <b>2</b>  | <b>-103.0540</b> | <b>2</b>    | <b>65.3</b>  | <b>4</b>    | <b>0.884</b> |
|                          | <b>3</b>  | <b>-100.9890</b> | <b>1</b>    | <b>70.17</b> | <b>1</b>    | <b>0.943</b> |
|                          | <i>4</i>  | <i>-98.6563</i>  | <i>94</i>   | <i>43.32</i> | <i>525</i>  | <i>0.071</i> |
|                          | <i>5</i>  | <i>-98.1414</i>  | <i>816</i>  | <i>37.34</i> | <i>353</i>  | <i>0.087</i> |
|                          | <i>6</i>  | <i>-97.3567</i>  | <i>58</i>   | <i>46.31</i> | <i>1748</i> | <i>0.018</i> |
|                          | <i>7</i>  | <i>-93.3654</i>  | <i>374</i>  | <i>39.36</i> | <i>246</i>  | <i>0.106</i> |
|                          | <b>8</b>  | <b>-92.0285</b>  | <b>9</b>    | <b>57.22</b> | <b>5</b>    | <b>0.883</b> |
|                          | <i>9</i>  | <i>-90.9654</i>  | <i>53</i>   | <i>46.73</i> | <i>1833</i> | <i>0.017</i> |
|                          | <i>10</i> | <i>-89.3951</i>  | <i>1152</i> | <i>36.56</i> | <i>531</i>  | <i>0.069</i> |
|                          | <i>11</i> | <i>-88.6364</i>  | <i>31</i>   | <i>48.46</i> | <i>1835</i> | <i>0.017</i> |
|                          | <i>12</i> | <i>-88.1059</i>  | <i>105</i>  | <i>42.83</i> | <i>1832</i> | <i>0.017</i> |
|                          | <b>13</b> | <b>-87.9235</b>  | <b>5</b>    | <b>58.63</b> | <b>8</b>    | <b>0.868</b> |
|                          | <i>14</i> | <i>-87.2222</i>  | <i>864</i>  | <i>37.22</i> | <i>478</i>  | <i>0.076</i> |
|                          | <i>15</i> | <i>-87.1608</i>  | <i>1642</i> | <i>35.64</i> | <i>248</i>  | <i>0.105</i> |
| pikL2A-sHMA94<br>(7nmEM) | <i>1</i>  | <i>-98.7345</i>  | <i>89</i>   | <i>44.6</i>  | <i>413</i>  | <i>0.065</i> |
|                          | <i>2</i>  | <i>-96.9769</i>  | <i>44</i>   | <i>47.52</i> | <i>443</i>  | <i>0.062</i> |
|                          | <b>3</b>  | <b>-96.8506</b>  | <b>6</b>    | <b>58.92</b> | <b>4</b>    | <b>0.903</b> |
|                          | <i>4</i>  | <i>-96.2425</i>  | <i>76</i>   | <i>45.19</i> | <i>131</i>  | <i>0.101</i> |
|                          | <i>5</i>  | <i>-94.7303</i>  | <i>1242</i> | <i>37.32</i> | <i>365</i>  | <i>0.068</i> |
|                          | <i>6</i>  | <i>-92.5136</i>  | <i>125</i>  | <i>43.68</i> | <i>484</i>  | <i>0.060</i> |
|                          | <i>7</i>  | <i>-92.2882</i>  | <i>1682</i> | <i>36.49</i> | <i>132</i>  | <i>0.100</i> |
|                          | <i>8</i>  | <i>-92.0933</i>  | <i>1433</i> | <i>36.89</i> | <i>62</i>   | <i>0.617</i> |
|                          | <i>9</i>  | <i>-91.9472</i>  | <i>225</i>  | <i>41.77</i> | <i>1215</i> | <i>0.022</i> |
|                          | <i>10</i> | <i>-90.8424</i>  | <i>303</i>  | <i>41.05</i> | <i>63</i>   | <i>0.615</i> |
|                          | <i>11</i> | <i>-90.7821</i>  | <i>1535</i> | <i>36.7</i>  | <i>119</i>  | <i>0.104</i> |
|                          | <i>12</i> | <i>-90.2980</i>  | <i>182</i>  | <i>42.53</i> | <i>538</i>  | <i>0.057</i> |
|                          | <i>13</i> | <i>-89.9076</i>  | <i>245</i>  | <i>41.62</i> | <i>340</i>  | <i>0.071</i> |
|                          | <b>14</b> | <b>-89.2384</b>  | <b>8</b>    | <b>58.46</b> | <b>1</b>    | <b>0.922</b> |
|                          | <i>15</i> | <i>-88.7354</i>  | <i>1180</i> | <i>37.47</i> | <i>448</i>  | <i>0.061</i> |
|                          | <b>1</b>  | <b>-107.1570</b> | <b>4</b>    | <b>61.17</b> | <b>1</b>    | <b>0.933</b> |

|                           |           |                  |             |              |             |              |
|---------------------------|-----------|------------------|-------------|--------------|-------------|--------------|
| pikL2A-sHMA94<br>(7nmmFN) | <b>2</b>  | <b>-104.5890</b> | <b>7</b>    | <b>59.99</b> | <b>3</b>    | <b>0.915</b> |
|                           | <i>3</i>  | <i>-98.8737</i>  | <i>34</i>   | <i>49.94</i> | <i>324</i>  | <i>0.086</i> |
|                           | <b>4</b>  | <b>-98.4579</b>  | <b>10</b>   | <b>58.72</b> | <b>4</b>    | <b>0.902</b> |
|                           | 5         | -94.6601         | 35          | 49.84        | 52          | 0.724        |
|                           | <b>6</b>  | <b>-89.5790</b>  | <b>21</b>   | <b>55.14</b> | <b>8</b>    | <b>0.868</b> |
|                           | <i>7</i>  | <i>-89.2866</i>  | <i>801</i>  | <i>38.89</i> | <i>673</i>  | <i>0.052</i> |
|                           | <b>8</b>  | <b>-88.8082</b>  | <b>2</b>    | <b>64.53</b> | <b>2</b>    | <b>0.922</b> |
|                           | <i>9</i>  | <i>-88.4652</i>  | <i>1157</i> | <i>37.91</i> | <i>467</i>  | <i>0.071</i> |
|                           | <i>10</i> | <i>-86.3931</i>  | <i>515</i>  | <i>40.06</i> | <i>1593</i> | <i>0.019</i> |
|                           | <i>11</i> | <i>-85.7750</i>  | <i>1244</i> | <i>37.71</i> | <i>1038</i> | <i>0.031</i> |
|                           | <i>12</i> | <i>-85.6505</i>  | <i>1351</i> | <i>37.51</i> | <i>531</i>  | <i>0.064</i> |
|                           | <i>13</i> | <i>-85.3202</i>  | <i>182</i>  | <i>42.98</i> | <i>1247</i> | <i>0.024</i> |
|                           | 14        | -85.1810         | 24          | 54.39        | 35          | 0.769        |
|                           | <i>15</i> | <i>-84.9025</i>  | <i>597</i>  | <i>39.67</i> | <i>1839</i> | <i>0.016</i> |
| pikL2A-sHMA94<br>(7nmmGO) | <b>1</b>  | <b>-107.1280</b> | <b>3</b>    | <b>60.89</b> | <b>5</b>    | <b>0.901</b> |
|                           | <b>2</b>  | <b>-97.7361</b>  | <b>15</b>   | <b>53.57</b> | <b>22</b>   | <b>0.811</b> |
|                           | <b>3</b>  | <b>-96.3148</b>  | <b>353</b>  | <b>41.62</b> | <b>9</b>    | <b>0.861</b> |
|                           | <b>4</b>  | <b>-96.1059</b>  | <b>2</b>    | <b>64.19</b> | <b>1</b>    | <b>0.941</b> |
|                           | <i>5</i>  | <i>-95.2097</i>  | <i>148</i>  | <i>44.23</i> | <i>286</i>  | <i>0.084</i> |
|                           | <b>6</b>  | <b>-93.2973</b>  | <b>1</b>    | <b>64.39</b> | <b>2</b>    | <b>0.913</b> |
|                           | <i>7</i>  | <i>-93.2249</i>  | <i>607</i>  | <i>40.07</i> | <i>432</i>  | <i>0.067</i> |
|                           | <i>8</i>  | <i>-90.2696</i>  | <i>827</i>  | <i>39.26</i> | <i>158</i>  | <i>0.106</i> |
|                           | <i>9</i>  | <i>-90.1811</i>  | <i>190</i>  | <i>43.38</i> | <i>12</i>   | <i>0.845</i> |
|                           | <i>10</i> | <i>-89.6073</i>  | <i>84</i>   | <i>45.86</i> | <i>1598</i> | <i>0.017</i> |
|                           | <i>11</i> | <i>-89.0801</i>  | <i>1371</i> | <i>37.82</i> | <i>369</i>  | <i>0.076</i> |
|                           | <i>12</i> | <i>-89.0095</i>  | <i>81</i>   | <i>45.98</i> | <i>512</i>  | <i>0.059</i> |
|                           | <i>13</i> | <i>-88.3740</i>  | <i>889</i>  | <i>39.05</i> | <i>243</i>  | <i>0.089</i> |
|                           | <i>14</i> | <i>-87.6273</i>  | <i>168</i>  | <i>43.8</i>  | <i>476</i>  | <i>0.062</i> |
|                           | <b>15</b> | <b>-86.9455</b>  | <b>11</b>   | <b>54.59</b> | <b>3</b>    | <b>0.910</b> |
| pikL2A-sHMA94<br>(7nmmHP) | <i>1</i>  | <i>-103.7700</i> | <i>587</i>  | <i>39.01</i> | <i>522</i>  | <i>0.061</i> |
|                           | <b>2</b>  | <b>-98.7045</b>  | <b>7</b>    | <b>57.27</b> | <b>6</b>    | <b>0.884</b> |
|                           | <i>3</i>  | <i>-96.3243</i>  | <i>193</i>  | <i>42.66</i> | <i>1614</i> | <i>0.018</i> |
|                           | <i>4</i>  | <i>-94.6288</i>  | <i>1109</i> | <i>37.24</i> | <i>968</i>  | <i>0.030</i> |
|                           | <b>5</b>  | <b>-94.3900</b>  | <b>13</b>   | <b>53.05</b> | <b>13</b>   | <b>0.833</b> |
|                           | <i>6</i>  | <i>-94.0671</i>  | <i>1131</i> | <i>37.2</i>  | <i>1989</i> | <i>0.013</i> |
|                           | <b>7</b>  | <b>-93.1513</b>  | <b>1</b>    | <b>63.64</b> | <b>5</b>    | <b>0.890</b> |
|                           | <i>8</i>  | <i>-92.3917</i>  | <i>848</i>  | <i>38.01</i> | <i>1548</i> | <i>0.019</i> |
|                           | <b>9</b>  | <b>-92.0384</b>  | <b>9</b>    | <b>56.77</b> | <b>2</b>    | <b>0.911</b> |
|                           | <b>10</b> | <b>-91.2643</b>  | <b>8</b>    | <b>57.23</b> | <b>1</b>    | <b>0.914</b> |
|                           | <i>11</i> | <i>-90.9757</i>  | <i>75</i>   | <i>45.99</i> | <i>1605</i> | <i>0.018</i> |
|                           | <i>12</i> | <i>-90.8388</i>  | <i>129</i>  | <i>44.3</i>  | <i>597</i>  | <i>0.054</i> |
|                           | <b>13</b> | <b>-90.0223</b>  | <b>2</b>    | <b>60.83</b> | <b>21</b>   | <b>0.817</b> |
|                           | <i>14</i> | <i>-89.9810</i>  | <i>1261</i> | <i>36.92</i> | <i>795</i>  | <i>0.037</i> |

|  |    |          |   |       |   |       |
|--|----|----------|---|-------|---|-------|
|  | 15 | -89.2407 | 5 | 57.96 | 4 | 0.893 |
|--|----|----------|---|-------|---|-------|

**Table S5:** List of fungal effector protein and their host receptor binding partners in MAX complexes, and important amino acid residues involved in the interactions between them as reported in the literature. Active residues are those involved in the interaction at the interface and passive residues are known not to be involved in the binding of fungal effector protein to the host partner.

| Effector and fungal species  | PDB ID: Chains | Active and passive residues                                                                                                      | Host receptor binding partner, plant species, PDB ID and active and passive residues                                                                                                                                                                       | References                              |
|------------------------------|----------------|----------------------------------------------------------------------------------------------------------------------------------|------------------------------------------------------------------------------------------------------------------------------------------------------------------------------------------------------------------------------------------------------------|-----------------------------------------|
| Avr1CO39<br><i>M. oryzae</i> | 5ZNG*:C        | Active:<br><i>H-bonds:</i> Trp23, Lys24, Asn37, Ile39, Thr41<br><i>Hydrophobic contacts:</i> Ala22, Ile27, Asn38, Tyr40          | RGA5<br><i>Oryza sativa</i> (5ZNG*:A)<br><br><i>Binding areas with Avr and dimerisation:</i><br><i>H-bonds:</i> Val1025, Asp1026, Val1028, Ile1030.<br><i>Hydrophobic contacts:</i> Met1016, Ala1017, Ala1020, Ser1021, Asn1023, Gly1024, Ser1027, Glu1029 | (Cesari et al., 2013; Guo et al., 2018) |
| AVR-Pia<br><i>M. oryzae</i>  | 6Q76*:B        | Active:<br>Leu38, Tyr41, Arg43, Tyr85                                                                                            | PikpHMA<br><i>Oryza sativa, Nicotiana benthamiana</i> (6Q76*:A)<br><br><i>Binding residues:</i> Ser204, Ser212, Asp217, Val219, Arg226                                                                                                                     | (Varden et al., 2019)                   |
| Avr-PikC<br><i>M. oryzae</i> | 7A8X*:C,F      | Active:<br><i>Binding interface:</i><br>1: Thr69, Ile49<br>2: Asn46, Pro47, Gly48, Arg64, Asp66<br>3: Glu53, Tyr71, Ser72, Trp74 | Pikh-HMA<br>(7A8X*:A,B,D,E)<br><i>Oryza sativa</i><br><br><i>Binding interface</i><br>1: Leu188-Lys191<br>2: Ser218-Val232<br>3: Glu253-Asp264                                                                                                             | (De La Concepcion et al., 2021)         |
| Avr-PikD<br><i>M. oryzae</i> | 6FU9*:B,D      | Active:<br><i>Binding interface:</i><br>1: Thr69, Ile49<br>2: His46, Pro47, Gly48, Arg64, Asp66<br>3: Glu53, Ser72, Trp74        | Pikm-HMA<br><i>Oryza sativa</i> (6FU9*: A,C)<br><br><i>Binding interface:</i><br>1: Glu188-Lys191<br>2: Ser219-Val233, Lys195<br>3: Met254-Asp264                                                                                                          | (De La Concepcion et al., 2018)         |

|                              |                                 |                                                                                                                                        |                                                                                                                                                                                                                       |                                                |
|------------------------------|---------------------------------|----------------------------------------------------------------------------------------------------------------------------------------|-----------------------------------------------------------------------------------------------------------------------------------------------------------------------------------------------------------------------|------------------------------------------------|
| Avr-PikE<br><i>M. oryzae</i> | 6G11*:C,F<br>6R8M*:G<br>6FUB*:B | Active:<br><i>Binding interface:</i><br>1: Thr69, Ile49<br>2: Asn46, Pro47,<br>Gly48, Arg64, Asp66<br>3: Glu53, Ser72,<br>Trp74        | PikpHMA<br><i>Oryza sativa</i> ,<br><i>Nicotiana benthamiana</i><br>(6G11*: B,E)<br>Pikp -HMA <sup>NK-KE</sup> (6R8M*:F)<br><br><i>Binding interface:</i><br>1: Leu188-Lys191<br>2: Ser218-Val232<br>3: Glu253-Asp264 | (De La<br>Concepcion<br>et al., 2018,<br>2019) |
|                              |                                 | Active:<br><i>Binding interface:</i><br>1: Thr69, Ile49<br>2: Asn46, Pro47,<br>Gly48, Arg64, Asp66<br>3: Glu53, Tyr71,<br>Ser72, Trp74 | Pikm-HMA<br><i>Oryza sativa</i><br>(6FUB*: A)<br><br><i>Binding interface:</i><br>1: Glu188-Lys191<br>2: Ser219-Val233, Lys195<br>3: Met254-Asp264                                                                    | (De La<br>Concepcion<br>et al., 2018)          |
| Avr-PikF<br><i>M. oryzae</i> | 7B1I*:C                         | Active:<br><i>Binding interface:</i><br>1: Thr69<br>2: Asn46, Ala67,<br>Asp68<br>3: Glu53, Try71,<br>Ser72, Trp74<br>Lys78             | OsHIPPI9<br><i>Oryza sativa</i><br>(7B1I*:B)<br><br><i>Binding interface:</i><br>1: Lys4<br>2: Ser31-Val46<br>3: Glu67-Glu76                                                                                          | (Maidment<br>et al., 2021)                     |
| ApikL2F<br><i>M. oryzae</i>  | 7NMM*:<br>A,B,C,D,E,F,<br>G,H   | Active:<br><i>Binding interface:</i><br>1: Val69, Ile49<br>2: His46, Pro47,<br>Gly48, Arg64, Asn66<br>3: Asp53, Ser72,<br>Trp74        | sHMA94<br><i>Setaria italica</i><br>(7NMM*: I,J,K,L,M,N,O,P)<br><br><i>Binding interface:</i><br>1: Leu5-Ile8<br>2: Ser33-Val47<br>3: Arg68-Glu76                                                                     | (Bentham et<br>al., 2021)                      |

\*Effector-plant protein complex structure.

\*\*Numbered groups in active and passive residues represent residues that are known to specifically interact with the residues in the corresponding host receptor binding partner.

1. S. Cesari, G. Thilliez, C. Ribot, V. Chalvon, C. Michel, A. Jauneau, S. Rivas, L. Alaux, H. Kanzaki, Y. Okuyama, J. B. Morel, E. Fournier, D. Tharreau, R. Terauchi, T. Kroj, The rice resistance protein pair RGA4/RGA5 recognizes the Magnaporthe oryzae effectors AVR-Pia and AVR1-CO39 by direct binding, The Plant cell. 25 (2013) 1463–1481. <https://doi.org/10.1105/tpc.112.107201>.
2. L. Guo, S. Cesari, K. de Guillen, V. Chalvon, L. Mammri, M. Ma, I. Meusnier, F. Bonnot, A. Padilla, Y.L. Peng, J. Liu, T. Kroj, Specific recognition of two MAX effectors by integrated HMA domains in plant immune receptors involves distinct binding surfaces, Proceedings of the National Academy of Sciences of the United States of America. 115 (2018) 11637–11642. <https://doi.org/10.1073/pnas.1810705115>.
3. F.A. Varden, H. Saitoh, K. Yoshino, M. Franceschetti, S. Kamoun, R. Terauchi, M.J. Banfield, Cross-reactivity of a rice NLR immune receptor to distinct effectors from the rice blast pathogen

- Magnaporthe oryzae provides partial disease resistance, *The Journal of biological chemistry*. 294 (2019) 13006–13016. <https://doi.org/10.1074/jbc.RA119.007730>.
4. J.C. De la Concepcion, J.H.R. Maidment, A. Longya, G. Xiao, M. Franceschetti, M.J. Banfield, The allelic rice immune receptor Pikh confers extended resistance to strains of the blast fungus through a single polymorphism in the effector binding interface, *PLOS Pathog.* 17 (2021) e1009368. <https://doi.org/10.1371/journal.ppat.1009368>.
  5. J.C. De la Concepcion, M. Franceschetti, A. Maqbool, H. Saitoh, R. Terauchi, S. Kamoun, M.J. Banfield, Polymorphic residues in rice NLRs expand binding and response to effectors of the blast pathogen, *Nature plants*. 4 (2018) 576–585. <https://doi.org/10.1038/s41477-018-0194-x>.
  6. J.C. De la Concepcion, M. Franceschetti, D. MacLean, R. Terauchi, S. Kamoun, M.J. Banfield, Protein engineering expands the effector recognition profile of a rice NLR immune receptor, *eLife*. 8 (2019) e47713. <https://doi.org/10.7554/eLife.47713>.
  7. J.H. Maidment, M. Franceschetti, A. Maqbool, H. Saitoh, C. Jantasuriyarat, S. Kamoun, R. Terauchi, M.J. Banfield, Multiple variants of the fungal effector AVR-Pik bind the HMA domain of the rice protein OsHIPP19, providing a foundation to engineer plant defense, *Journal of Biological Chemistry*. 296 (2021). <https://doi.org/10.1074/jbc.RA119.007730>.
  8. A.R. Bentham, Y. Petit-Houdenot, J. Win, I. Chuma, R. Terauchi, M.J. Banfield, S. Kamoun, T. Langner, A single amino acid polymorphism in a conserved effector of the multihost blast fungus pathogen expands host-target binding spectrum, *PLoS pathogens*. 17 (2021) e1009957. <https://doi.org/10.1371/journal.ppat.1009957>.



**Figure S1.** Correlation of ZDOCK score versus DockQ score for ZDOCK output of 54,000 docking poses for experimental complexes used in benchmarking. The docking pose with the best ZDOCK score is highlighted in red.

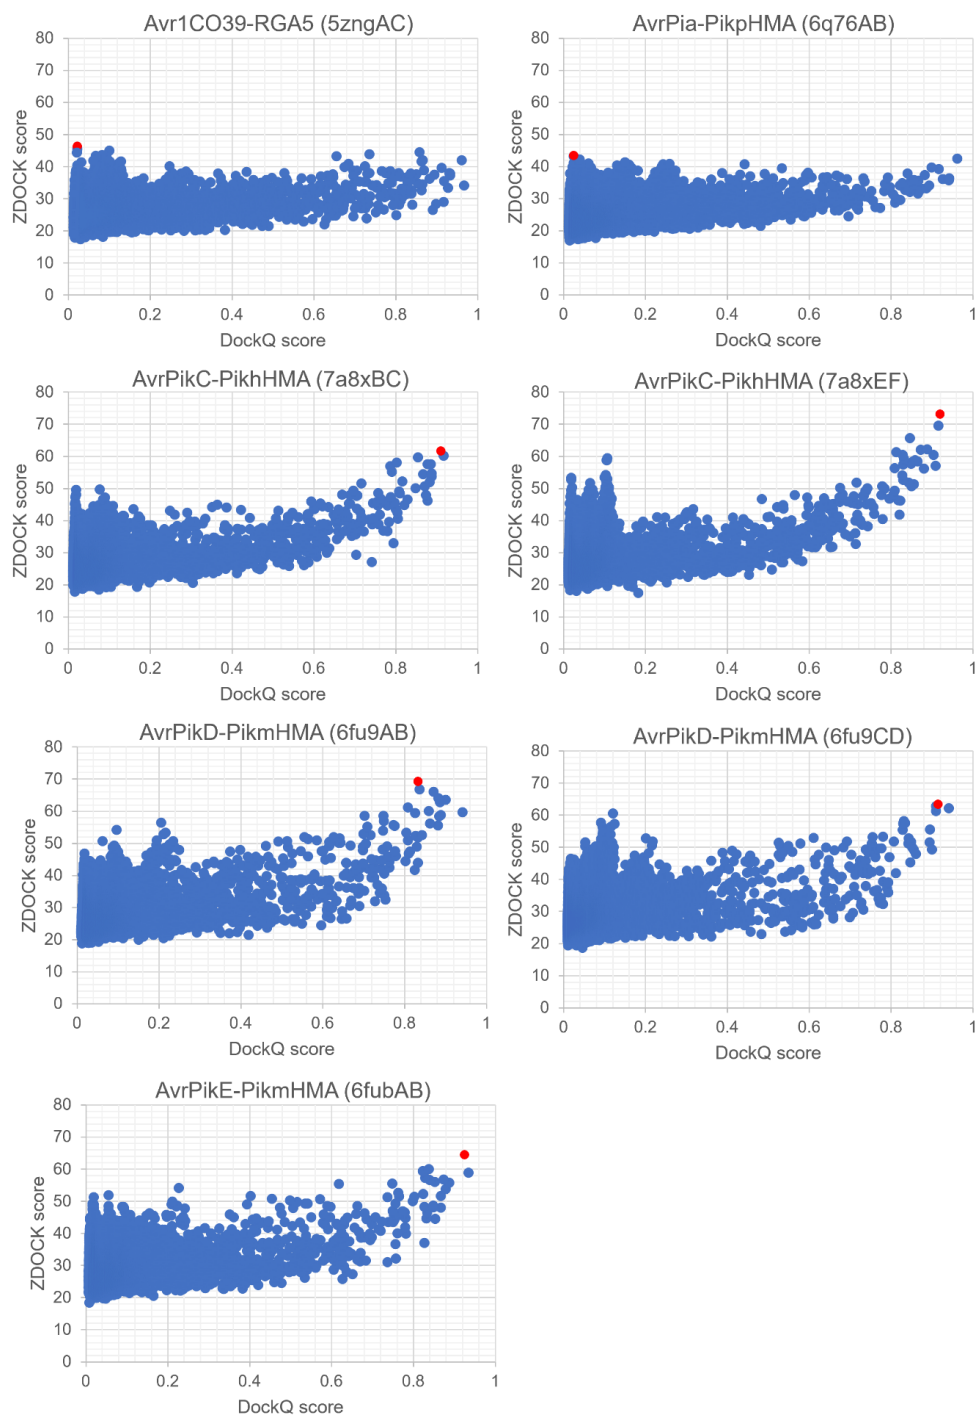

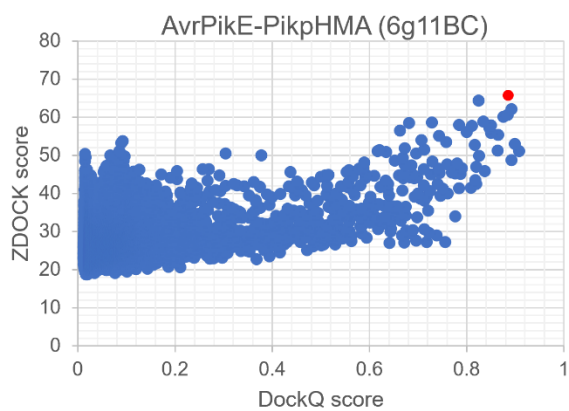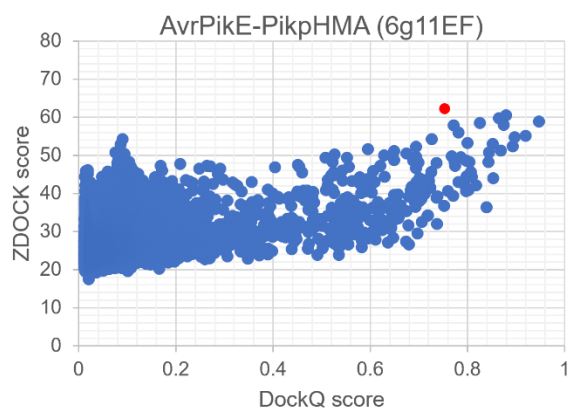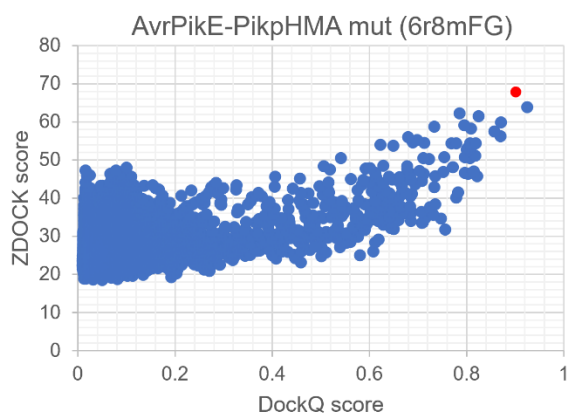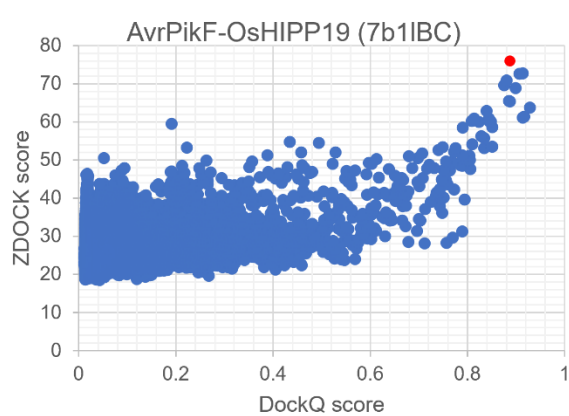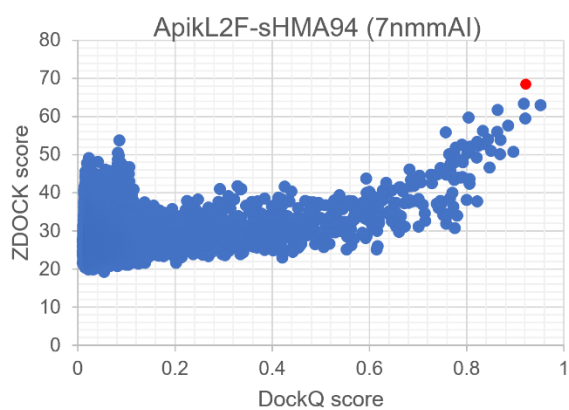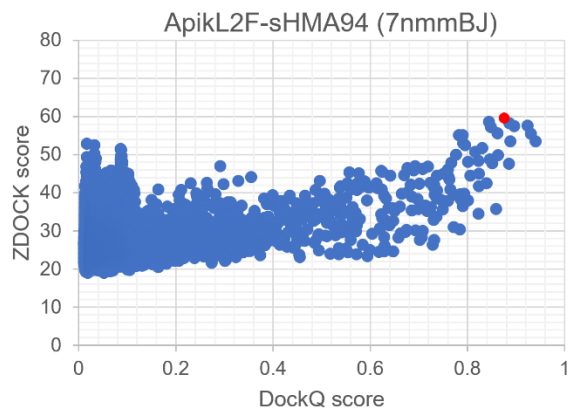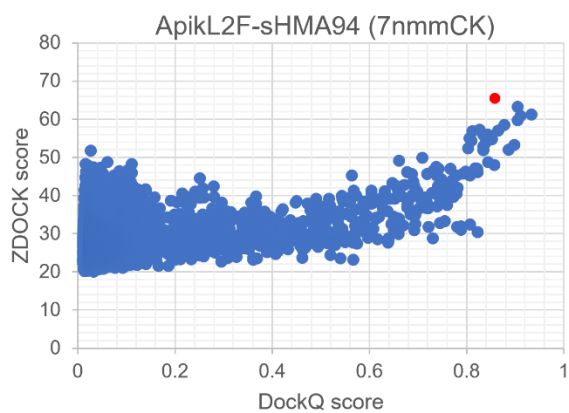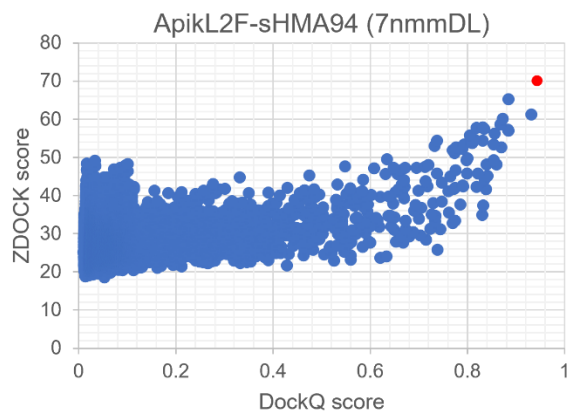

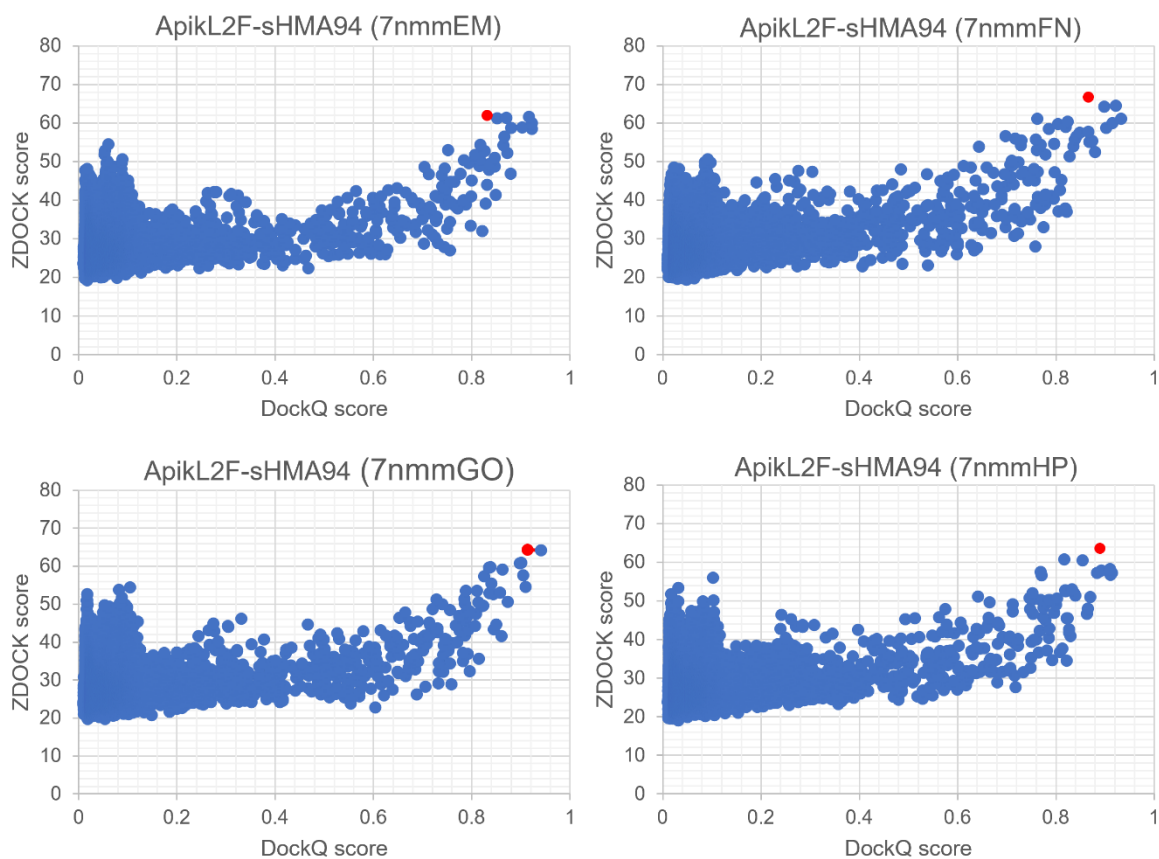

**Figure S2.** Correlation of ZRANK score versus DockQ score for the top 2000 ZDOCK score docking poses. Poses with the best ZRANK score are highlighted in red.

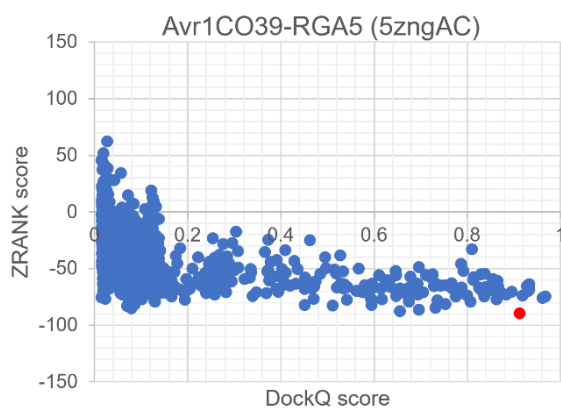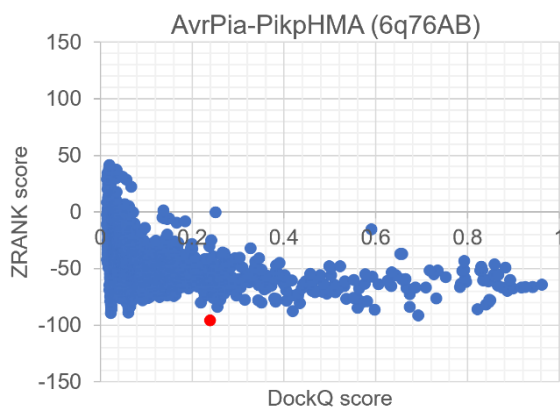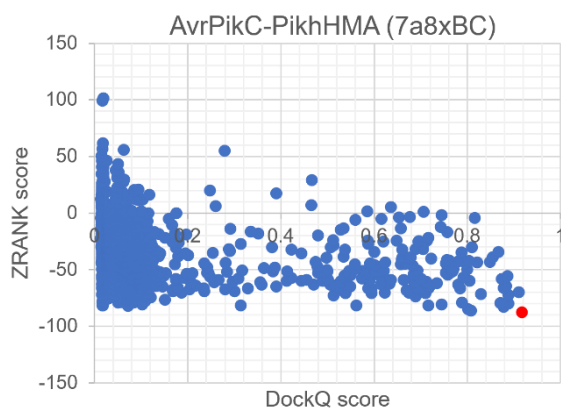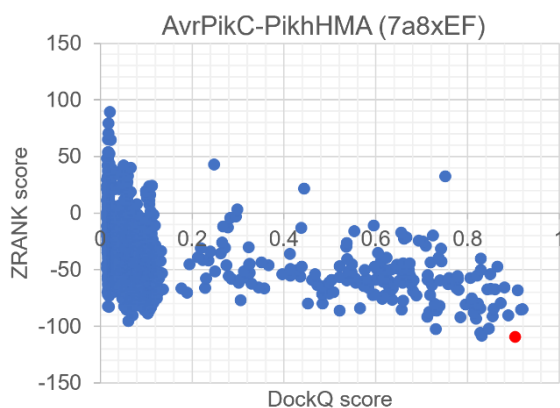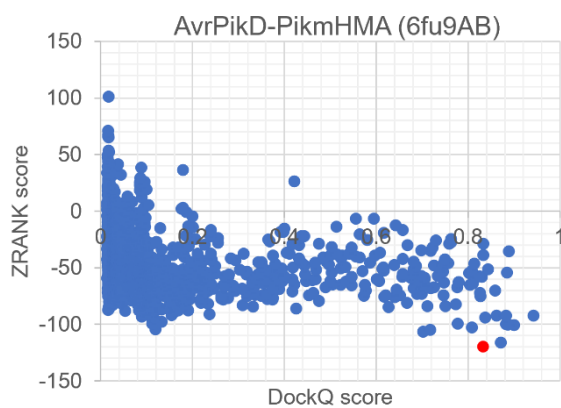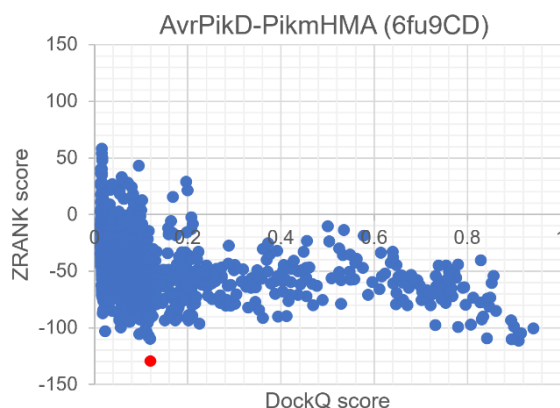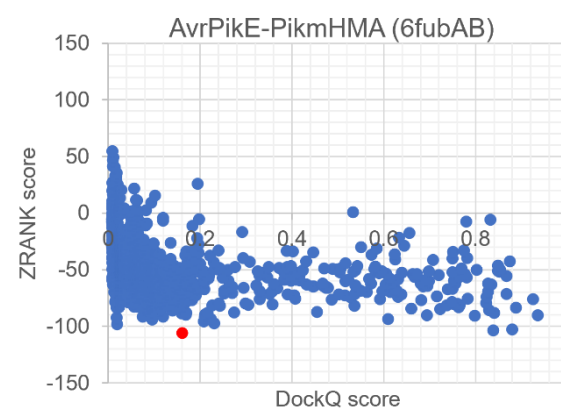

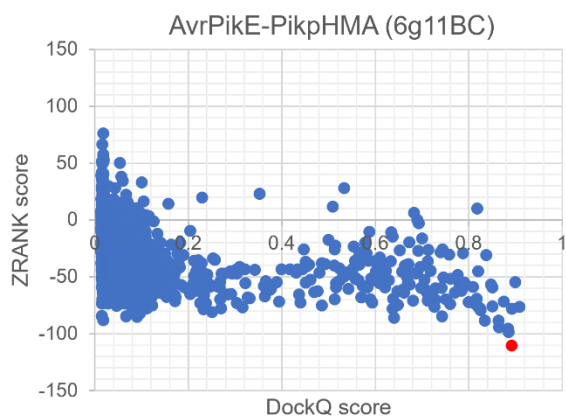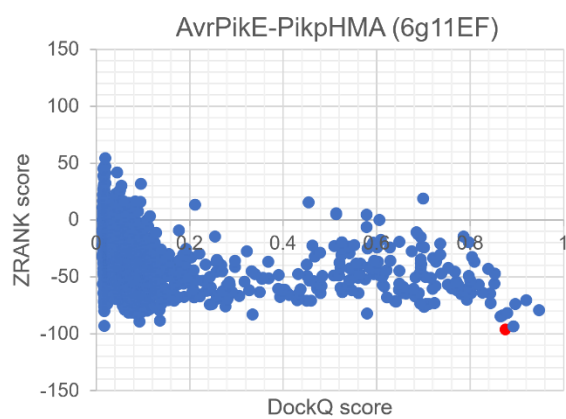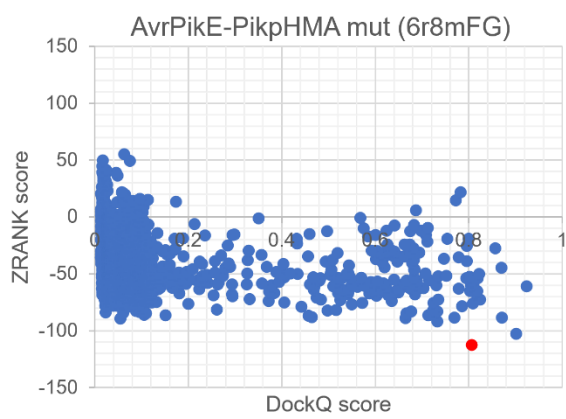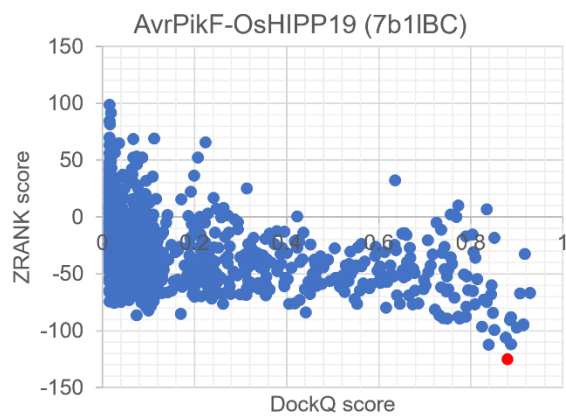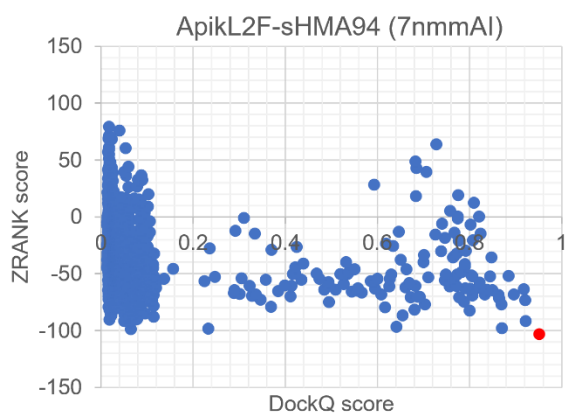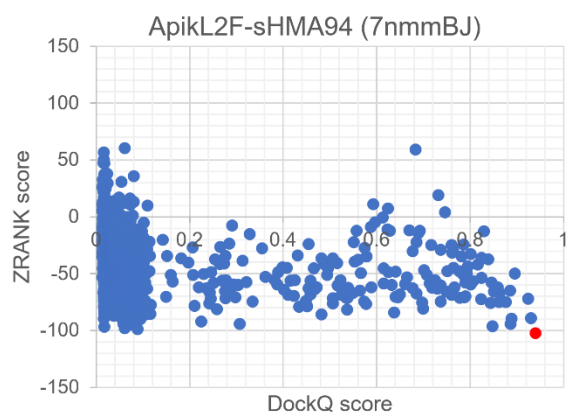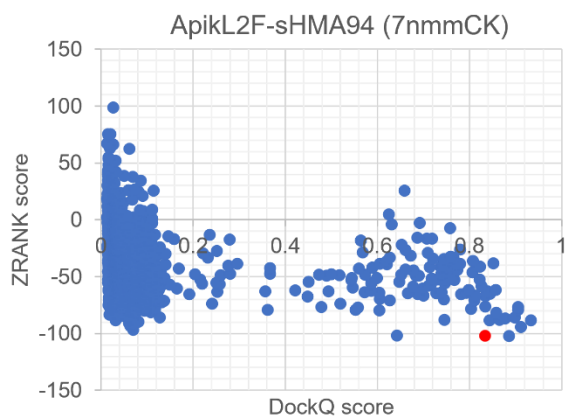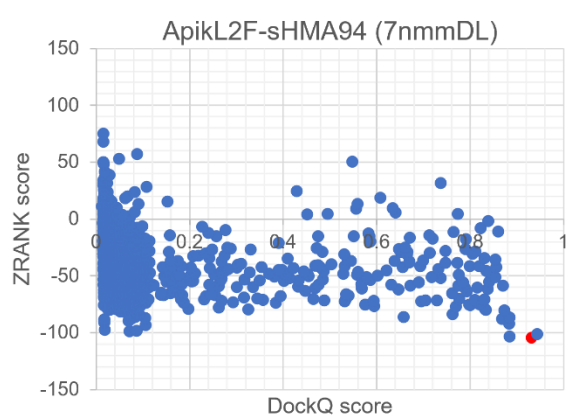

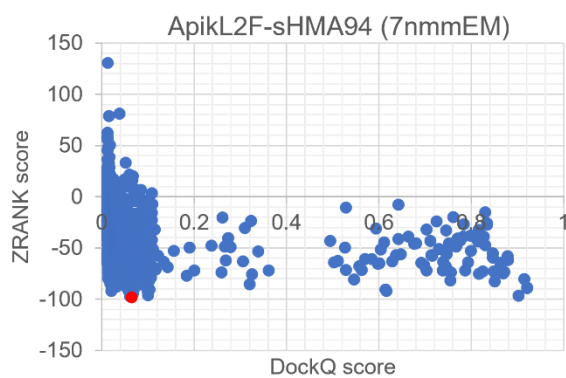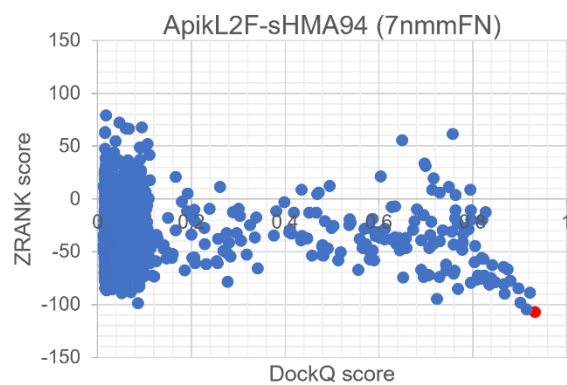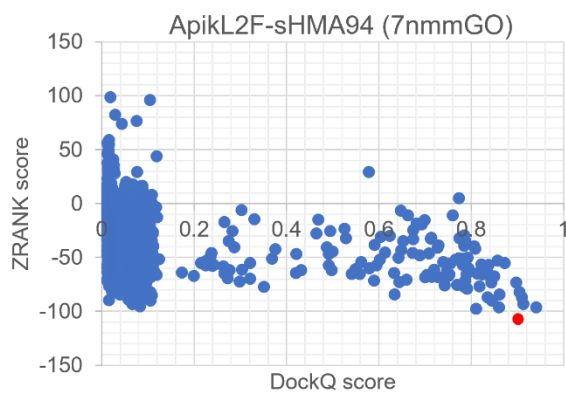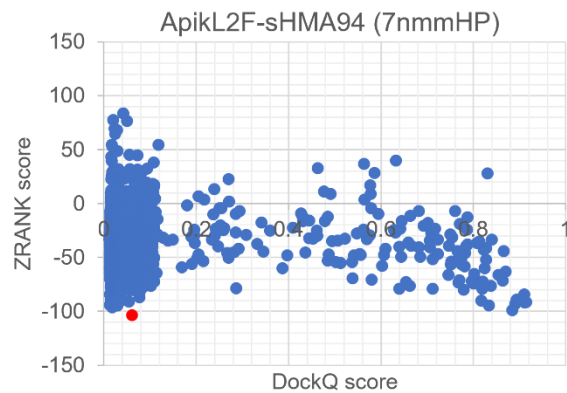

### **Assessment of docking output with and without residue restraints**

Similar to blind docking, all docking poses were assigned a ZDOCK score, ZRANK score and DockQ score, and the position/ranking of near-native docking poses was determined. In this study, only active residues were implemented and due to this, differences in the predictions between both docking approaches (with and without residues restraints) were only observed after re-scoring and re-ranking with ZRANK, such that the rankings of the top 2000 ZDOCK docking poses were similar for both docking approaches. After ZRANK re-scoring, differences in the total number of ZRANK docking poses (out of 2,000) were observed due to the use of residue restraints, which omitted poses that do not fulfil the restraints (Figure S3). Plots for all other bound complexes are in Figure S4. Detailed information on the docking poses that were excluded within the top 15 docking poses ranked with ZRANK after application of residue restraints can be found in Table S4. As shown in Figure S3, the use of residue restraints reduced the total number of docking poses, but the ZRANK score of poses predicted with both docking approaches exhibit similar correlations with DockQ score. The scatterplot of the chosen complex with ideal best pose, AvrPikC-PikhHMA (PDB ID 7a8xEF), illustrates the fact that out of a total of 2000 docking poses re-ranked with ZRANK, 173 satisfied the residue restraints and were thus retained, including the docking pose with the best ZRANK score and a DockQ score of 0.904 (near-native). It is also clear that docking poses with low (favourable) ZRANK score but poor DockQ score ( $<0.5$ ) were largely excluded by the use of residue restraints. In the case of the scatterplot of the chosen complex with non-ideal best pose, AvrPia-PikpHMA (PDB ID 6q76AB), 298 docking poses satisfied the residue restraints, including the docking pose with the best ZRANK score and a DockQ score of 0.24 (non-near-native). In comparison with blind docking, docking with residue restraints led to improved ranking of near-native docking poses because of the exclusion of poses that do not meet these restraints, resulting in an improvement of pose rankings. For example, in the case of effector-host receptor binding partner complex AvrPikE-PikmHMA (PDB ID 6fubAB), docking pose ranked 14th based on ZRANK score was ranked fourth after the application of residue restraints due to the exclusion of poses ranked at positions 4 to 13 (Table S4). Similar observations were made within the top-15 poses for all bound complexes, except for AvrPikF-OsHIPP19 (PDB ID 7b1iBC), showing that all of the top 15 docking poses based on ZRANK score satisfied the residue restraints. In summary, application of residue restraints excluded unwanted/non-ideal top poses (i.e. high ZRANK score, low DockQ score) and, consequently, improved the ranking of near native poses.

**Figure S3.** Correlation between ZRANK and DockQ scores for the top 2000 predicted docking poses using ZDOCK score with (in yellow) and without (in grey) the use of residue restraints. The plots shown correspond to effector-host receptor binding partner complexes with ideal best pose, A) AvrPikC-PikHMA (PDB ID 7a8xEF, and non-ideal best pose, B) AvrPia-PikpHMA (PDB ID 6q76AB). The docking pose with the best ZRANK score is shown in green in each plot. 2000 ZRANK (2k ZRANK) corresponds to the top 2,000 ZDOCK poses re-ranked using ZRANK.

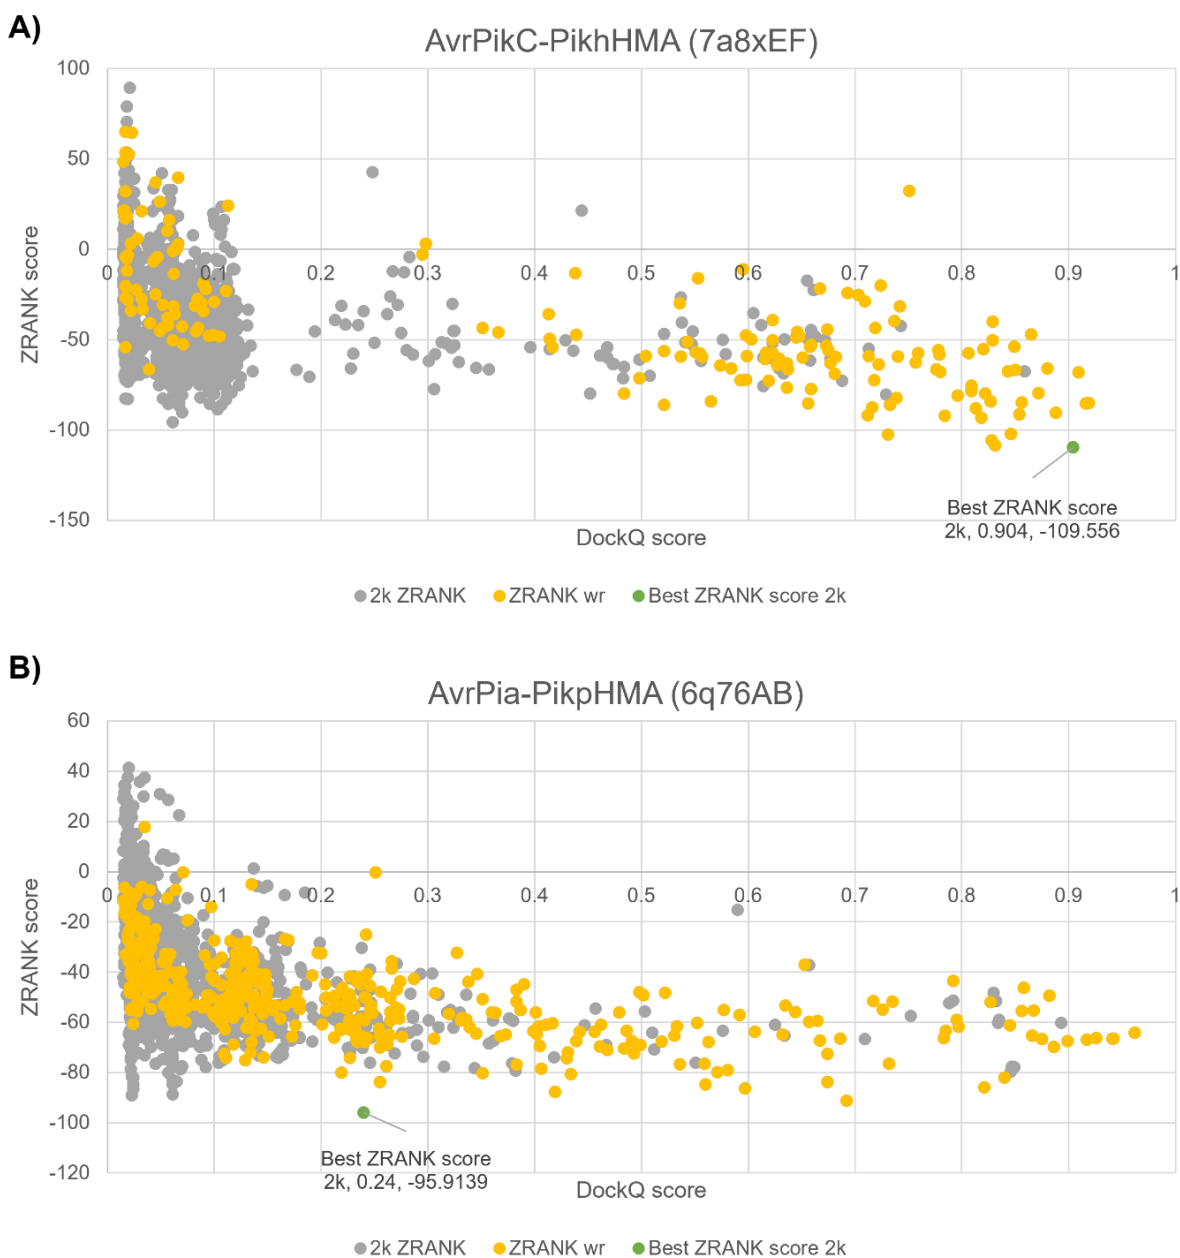



**Figure S4.** Correlation of ZDOCK and ZRANK scores against DockQ scores for ZDOCK 54,000, ZDOCK 2,000, ZRANK 2,000 docking poses. The best ZDOCK and ZRANK docking poses (in coloured dots) are shown as indicated by the figure legend. ZRANK 2,000 refers to the top 2,000 ZDOCK poses re-ranked using ZRANK.

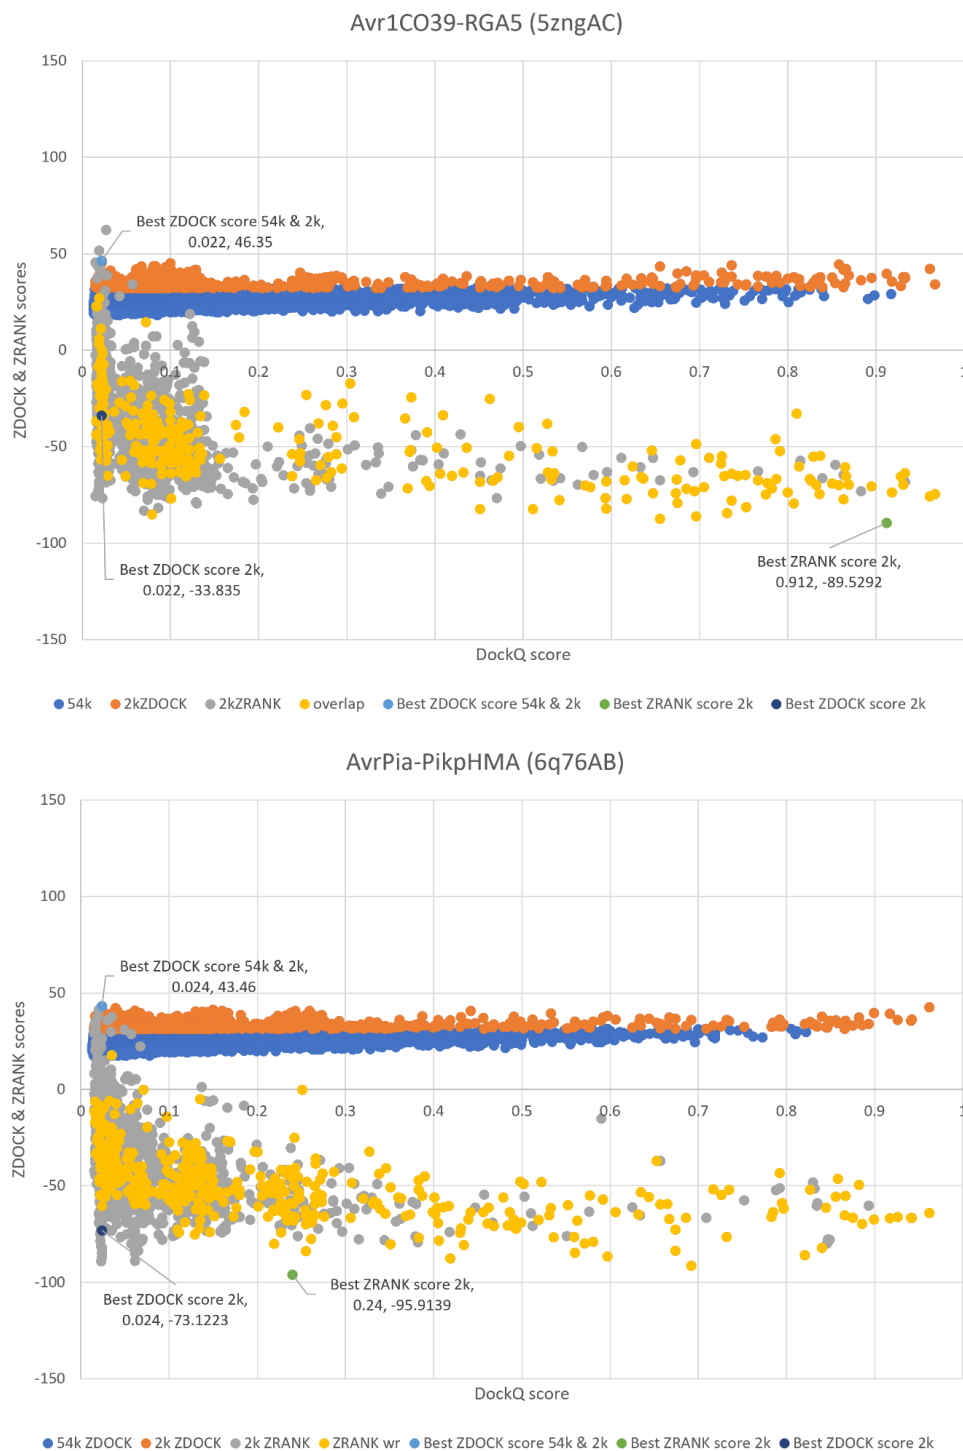

AvrPikC-PikhHMA (7a8xBC)

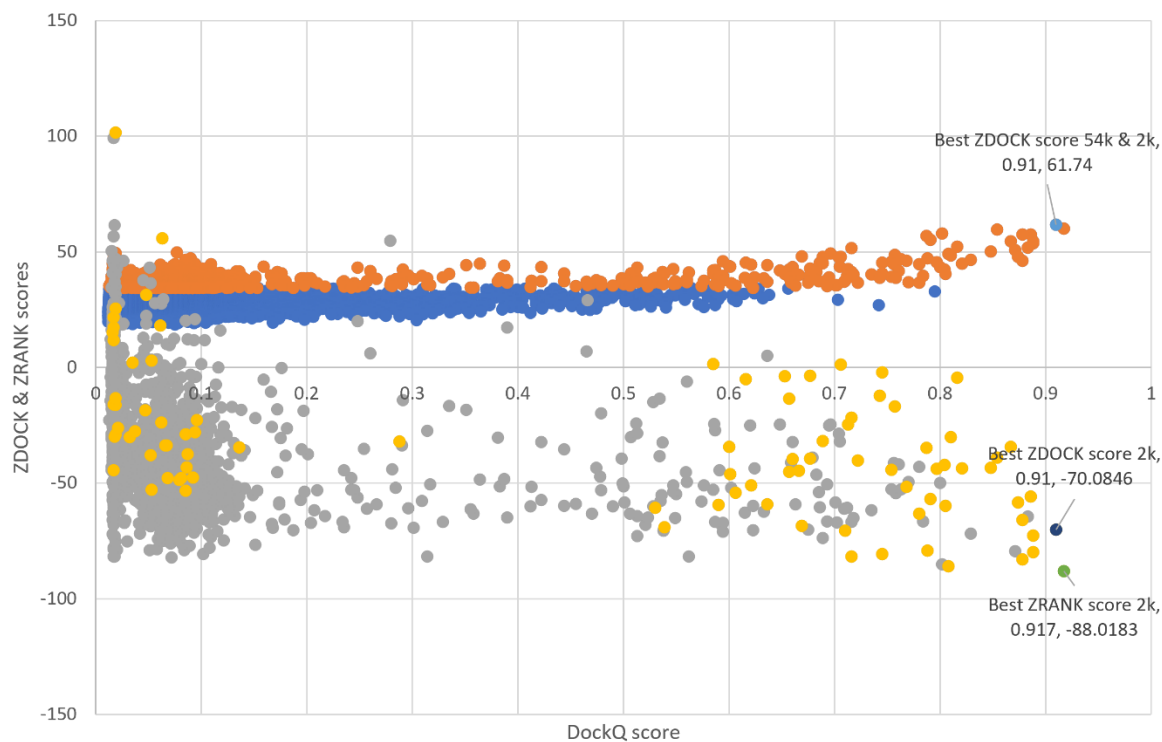

AvrPikC-PikhHMA (7a8xEF)

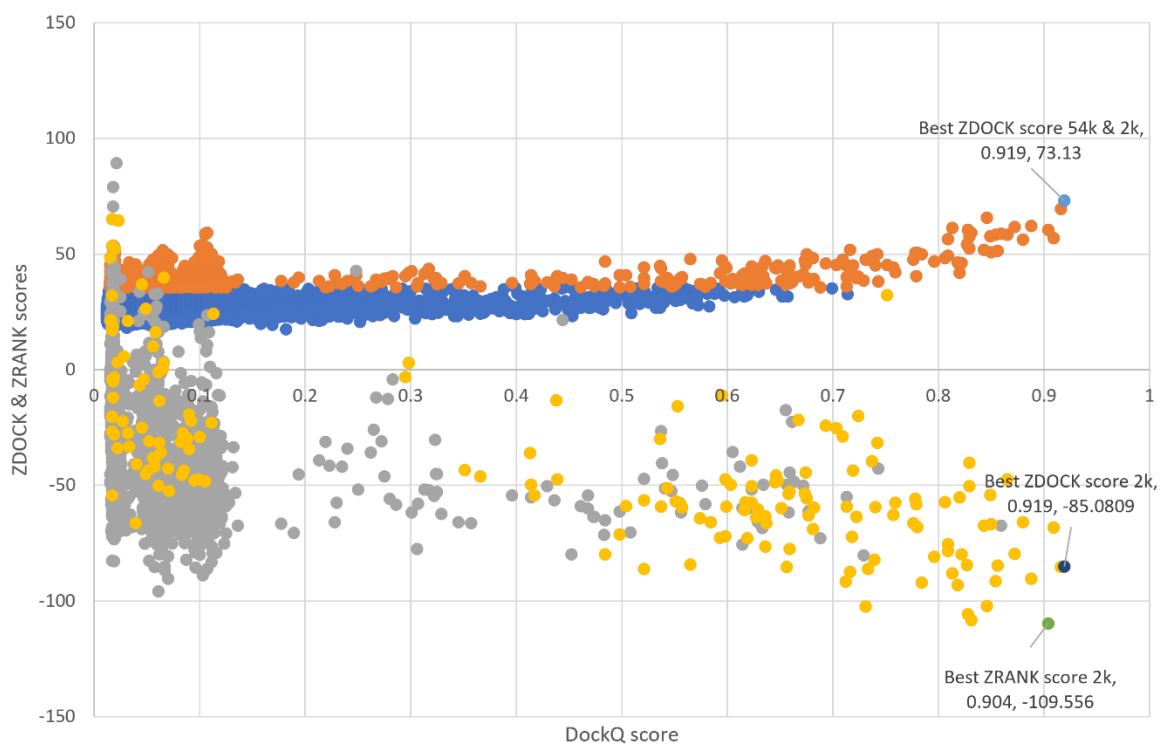

AvrPikD-PikmHMA (6fu9AB)

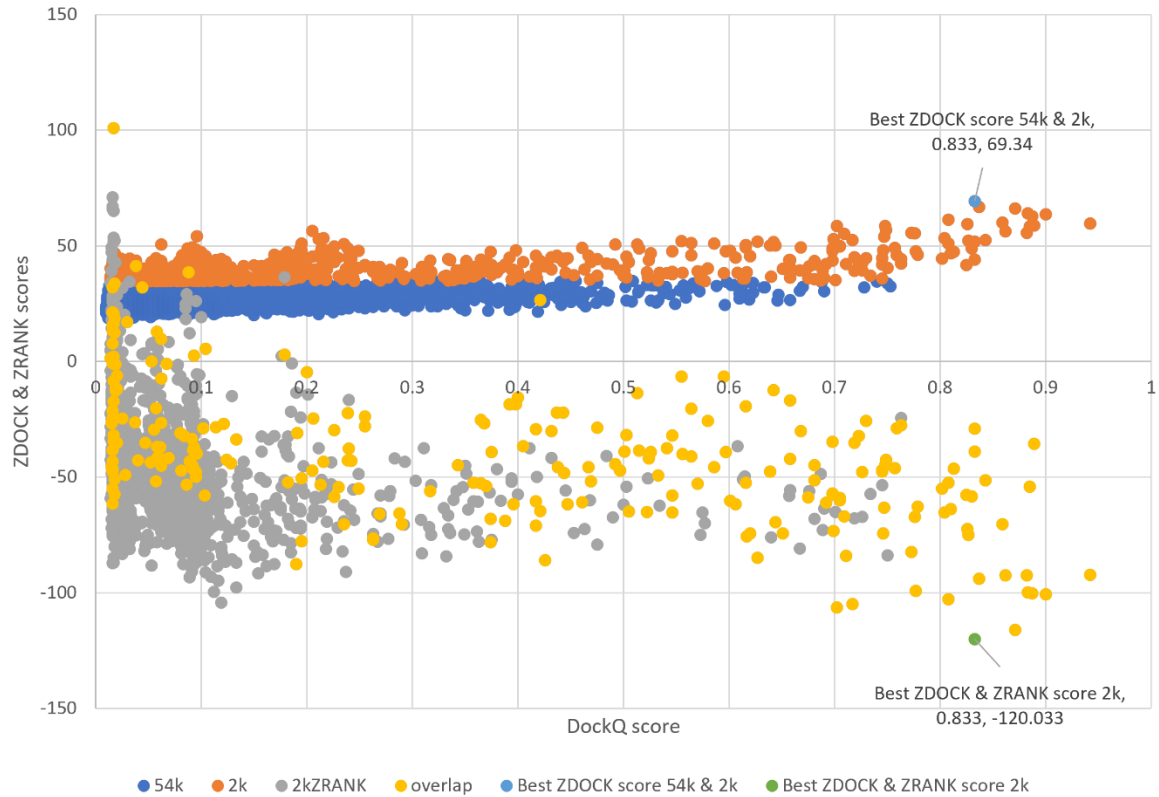

AvrPikD-PikmHMA (6fu9CD)

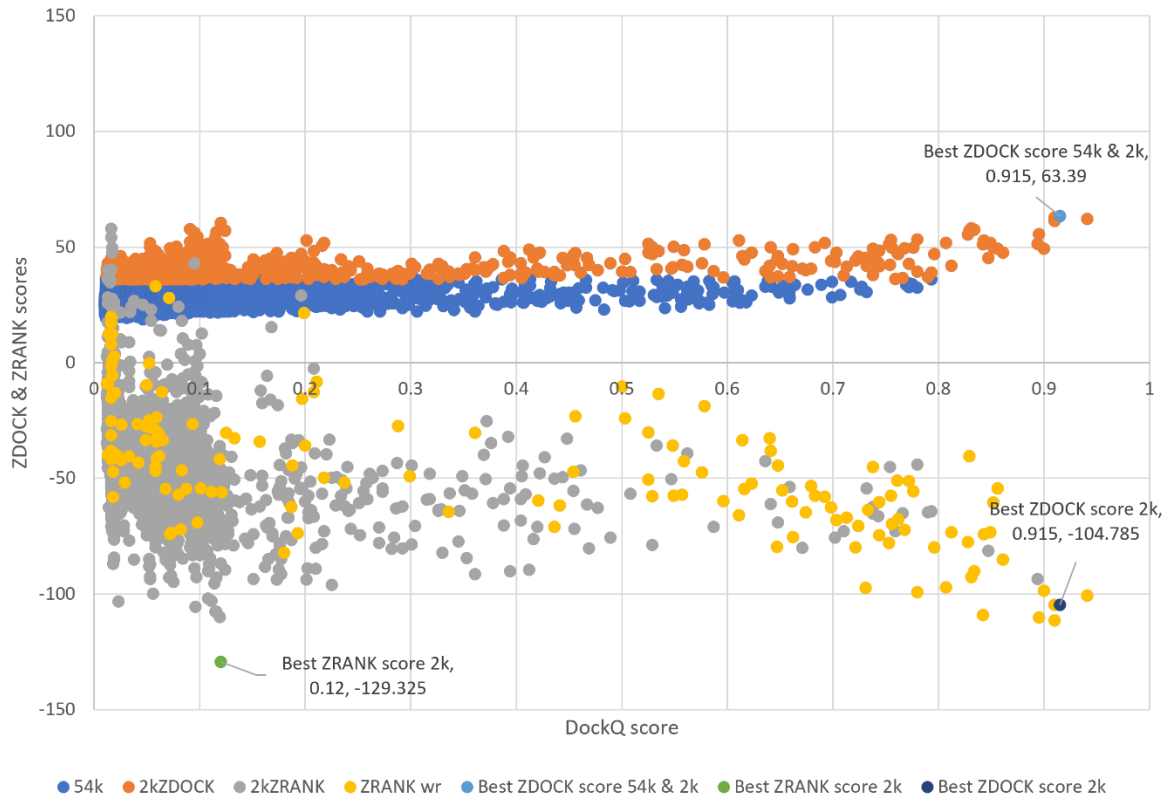

AvrPikE-PikmHMA (6fubAB)

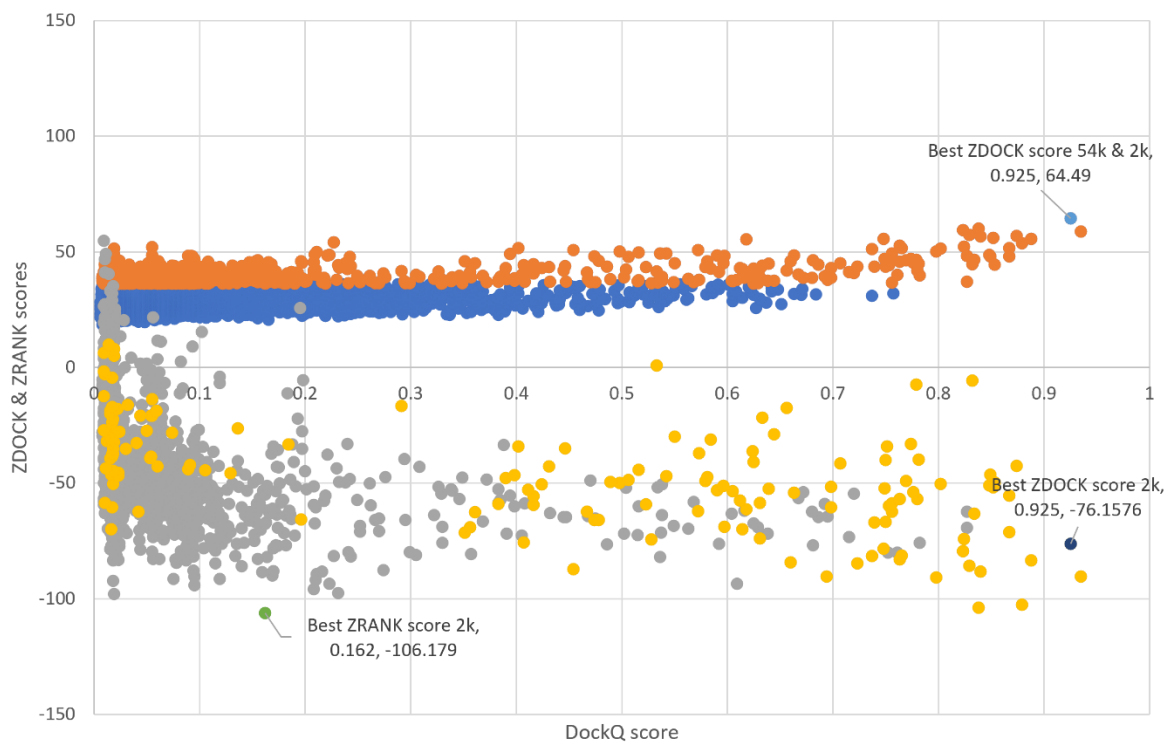

AvrPikE-PikpHMA (6g11BC)

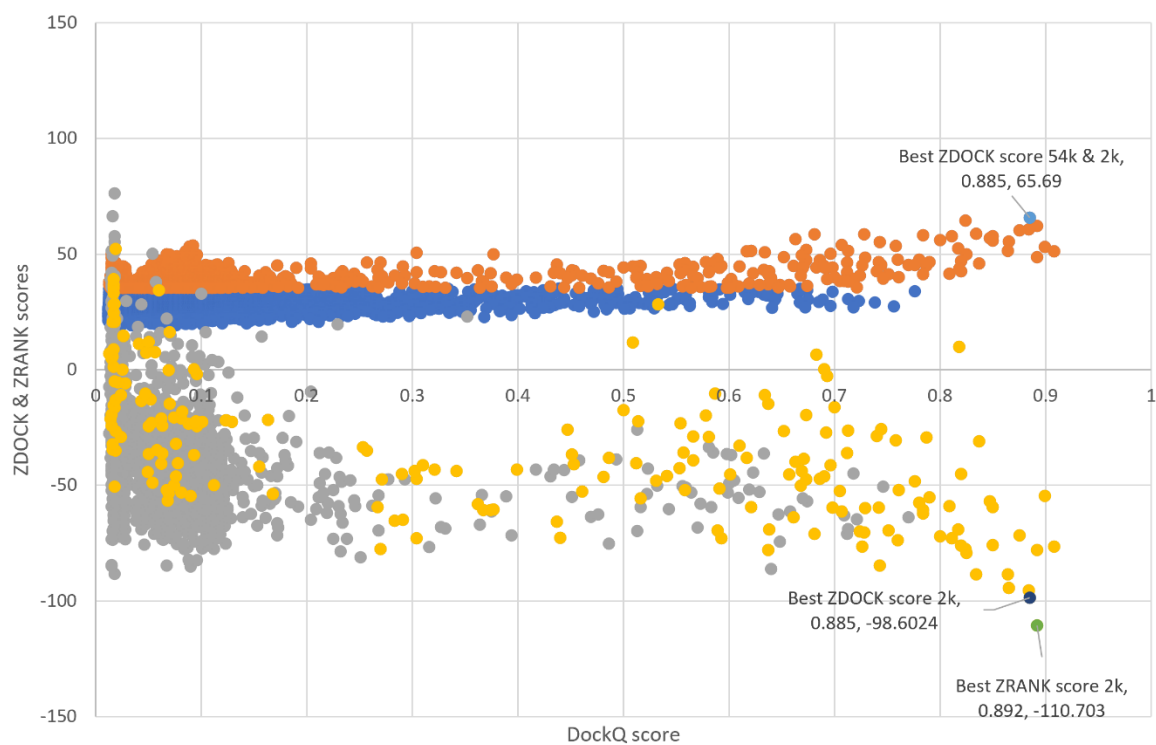

AvrPikE-PikpHMA (6g11EF)

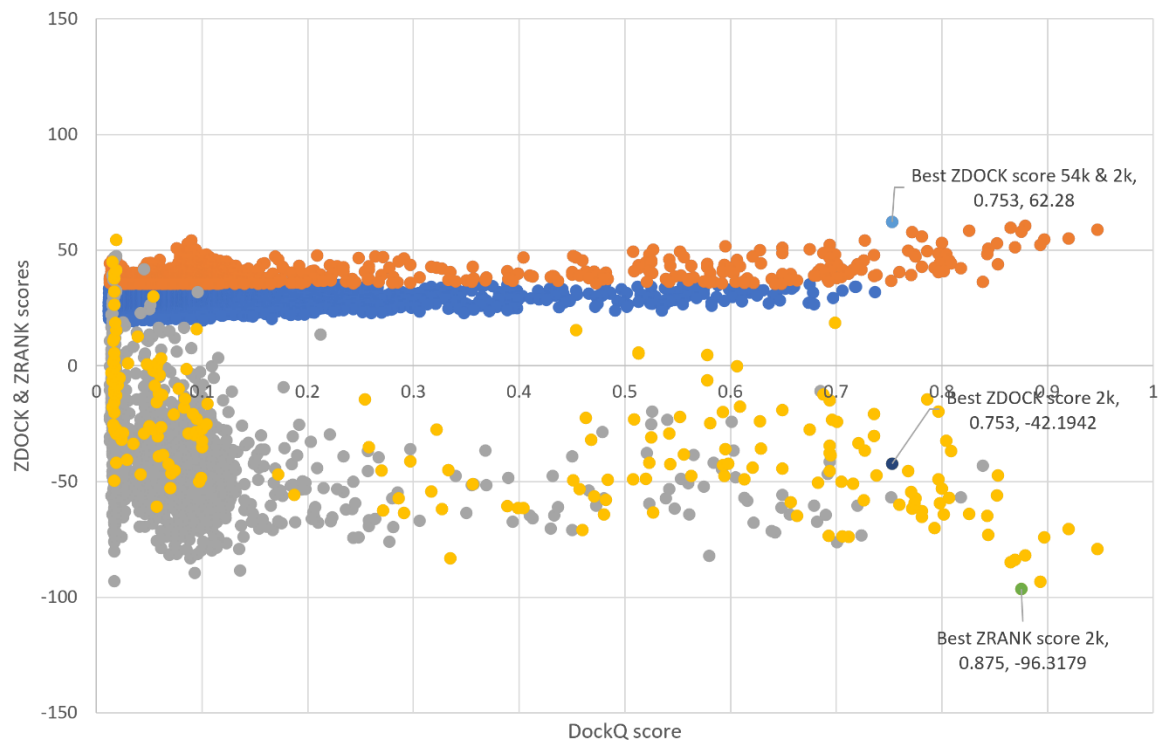

AvrPikE-PikpHMA (6r8mFG)

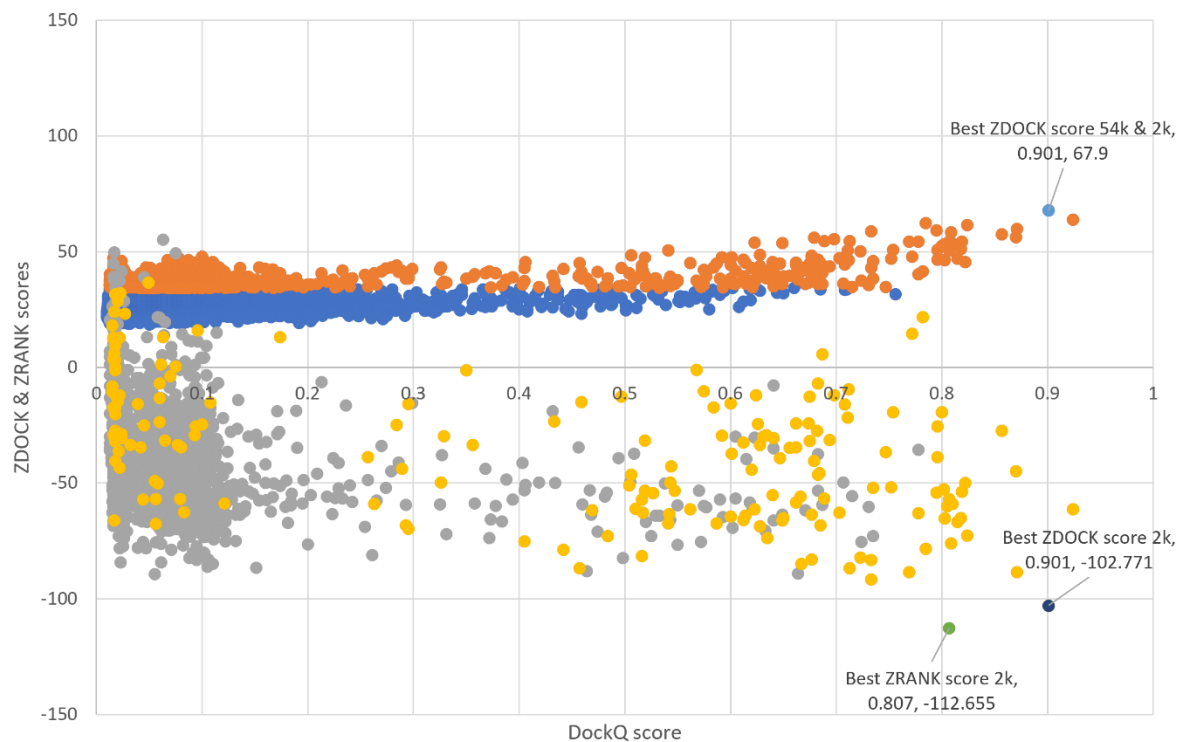

### AvrPikF-osHIPP19 (7b1iBC)

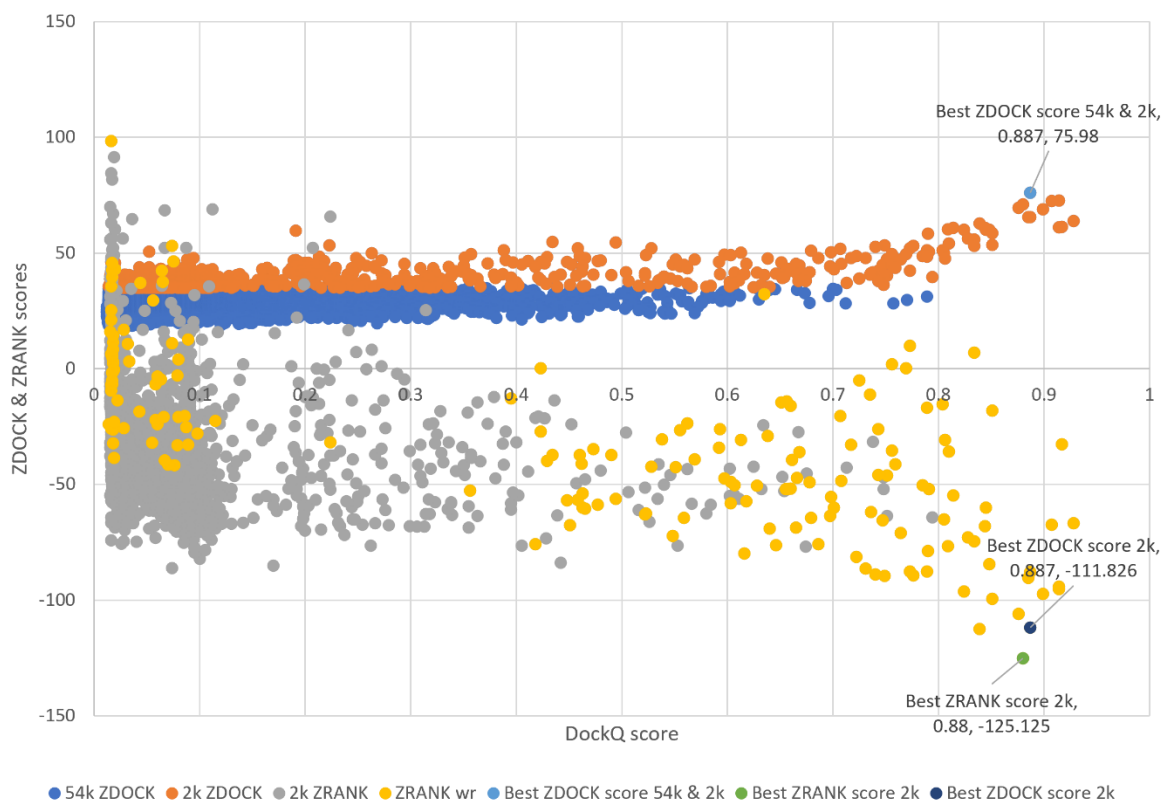

### ApikL2F-sHMA (7nmmAI)

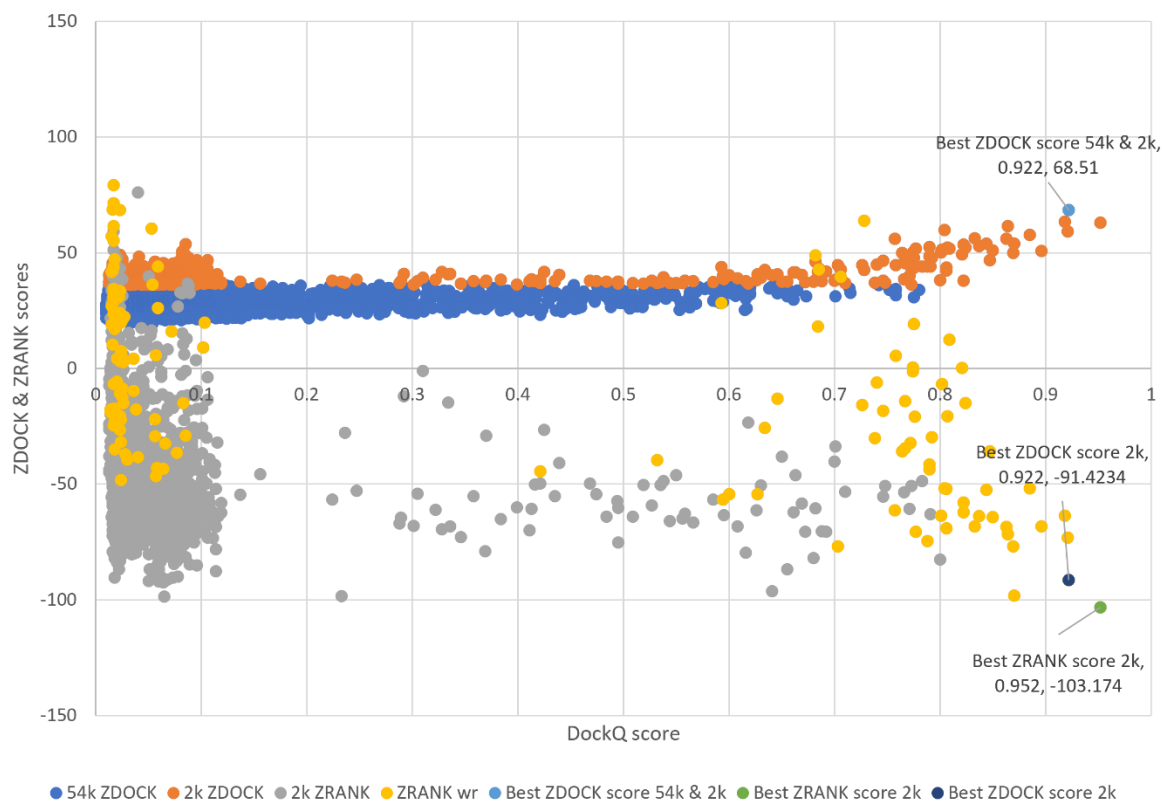

### ApikL2F-sHMA (7nmmBJ)

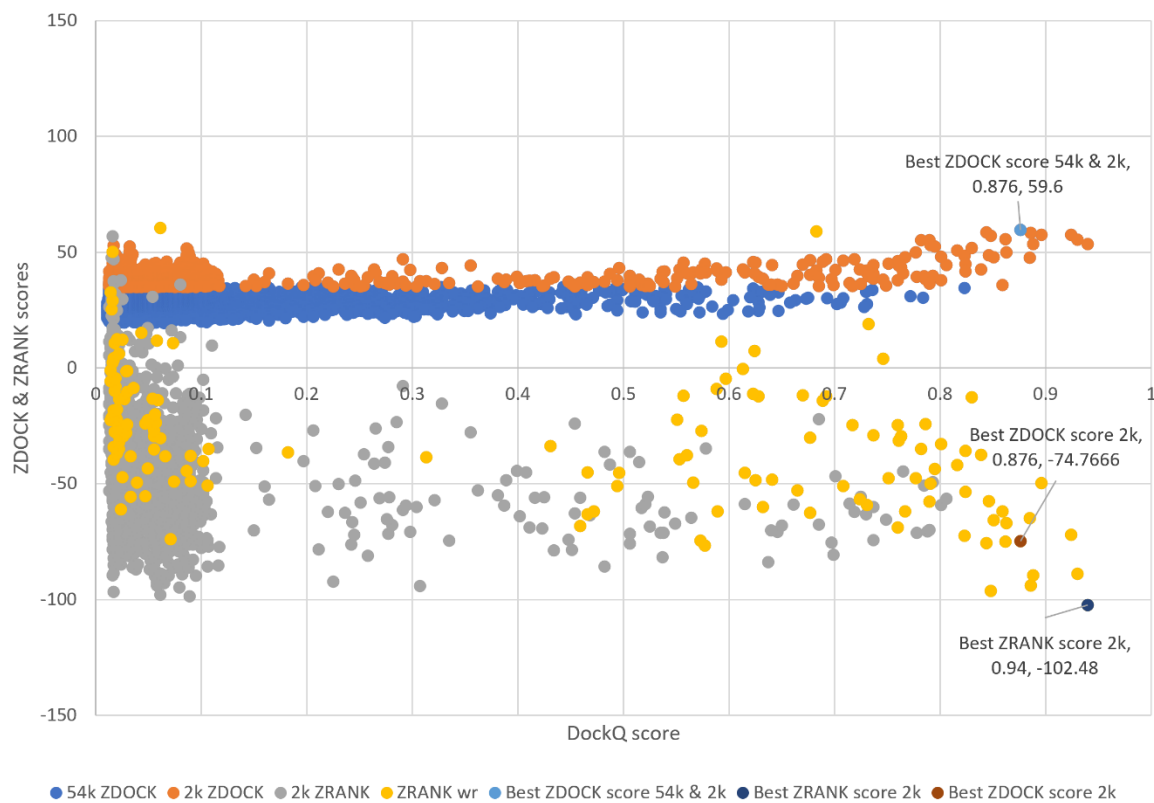

### ApikL2F-sHMA94 (7nmmCK)

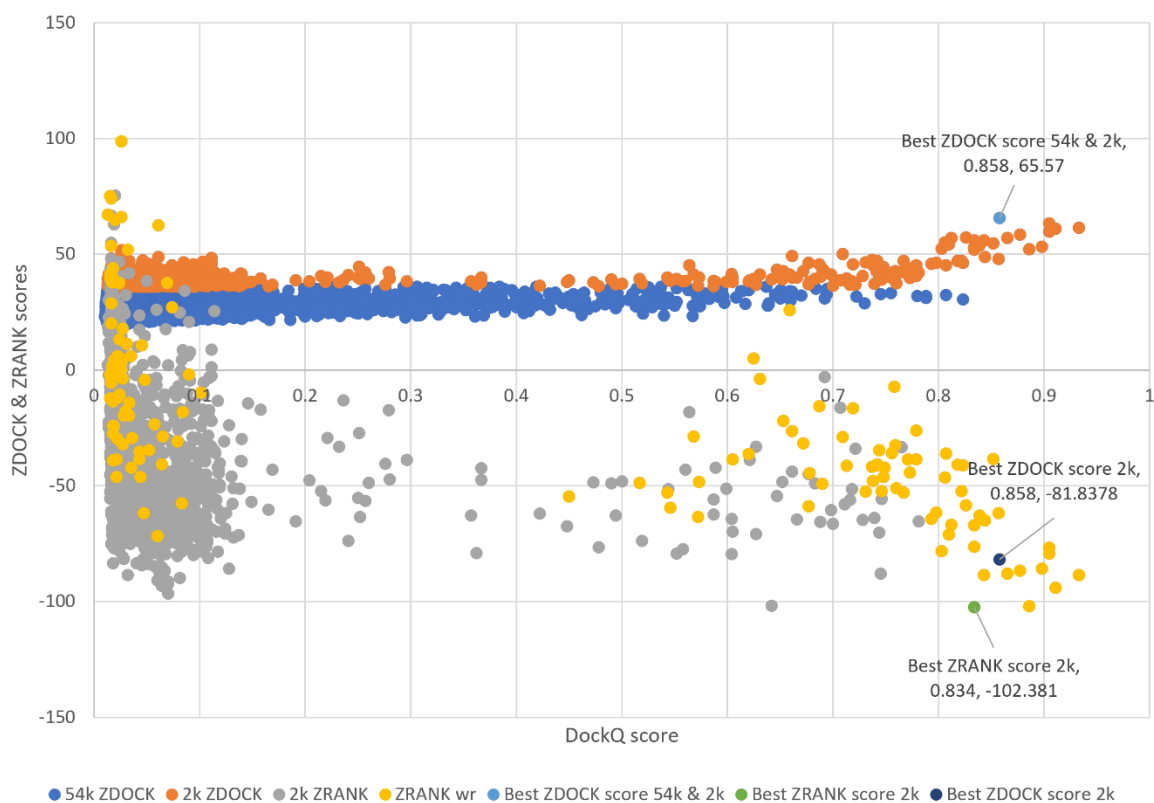

### ApikL2F-sHMA (7nmmDL)

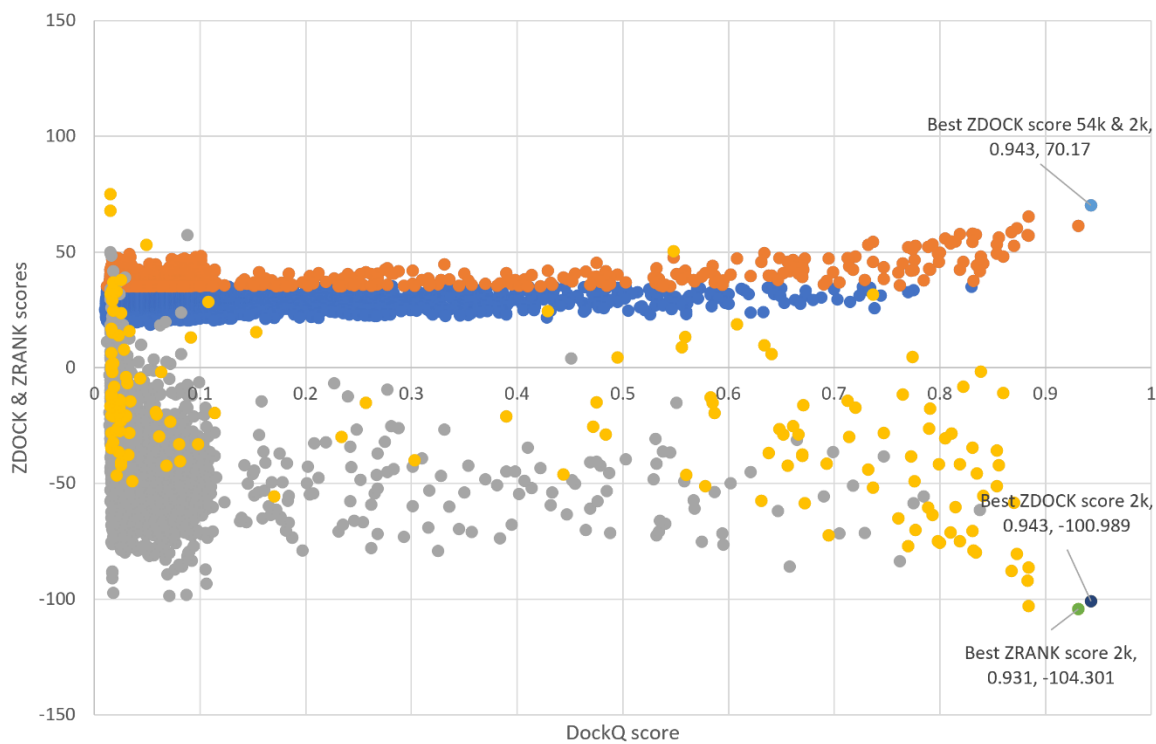

### ApikL2F-sHMA94 (7nmmEM)

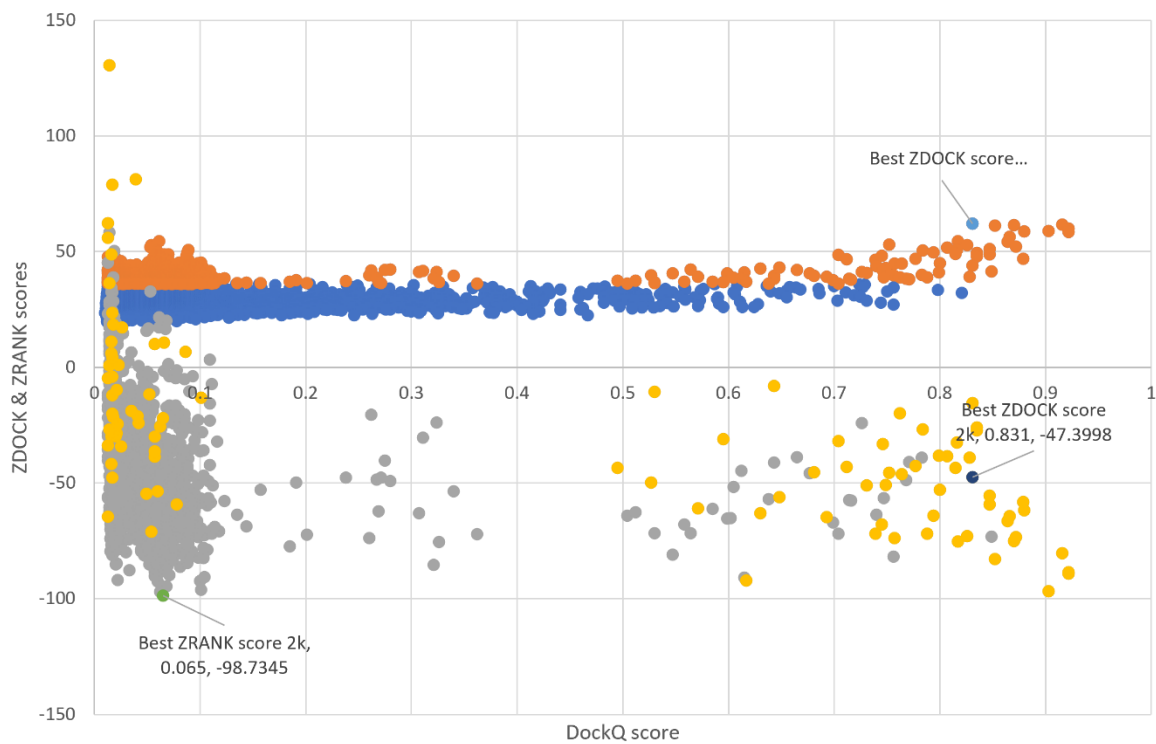



### ApikL2F-sHMA94 (7nmmFN)

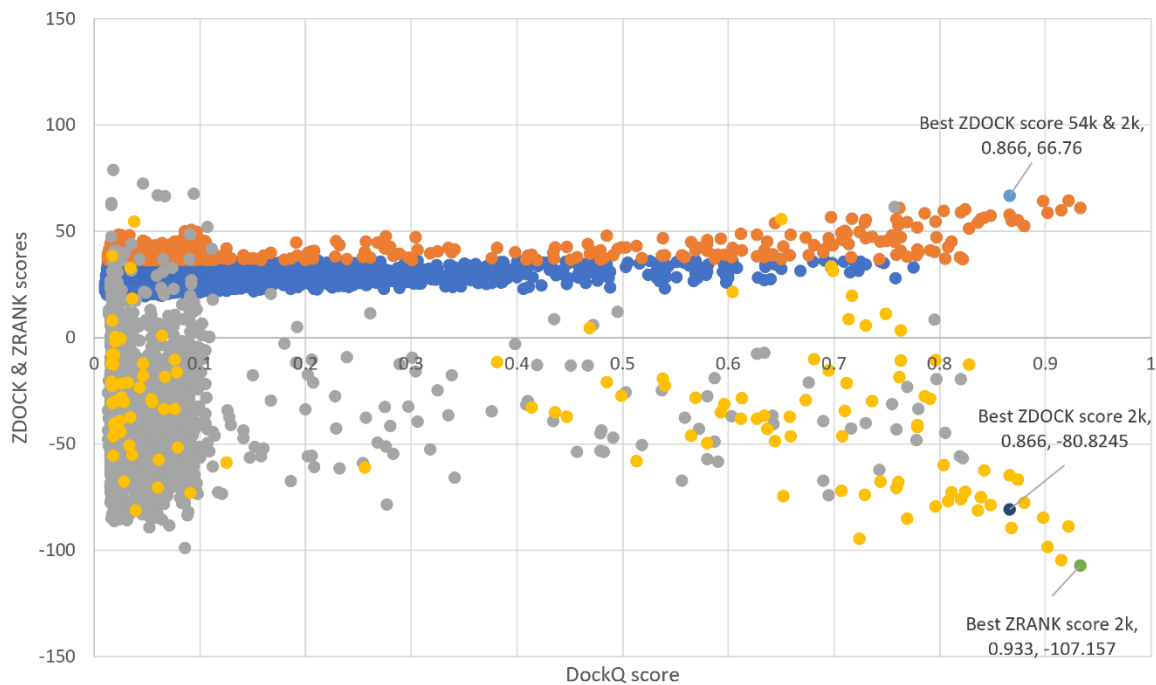

### ApikL2F-sHMA94 (7nmmGO)

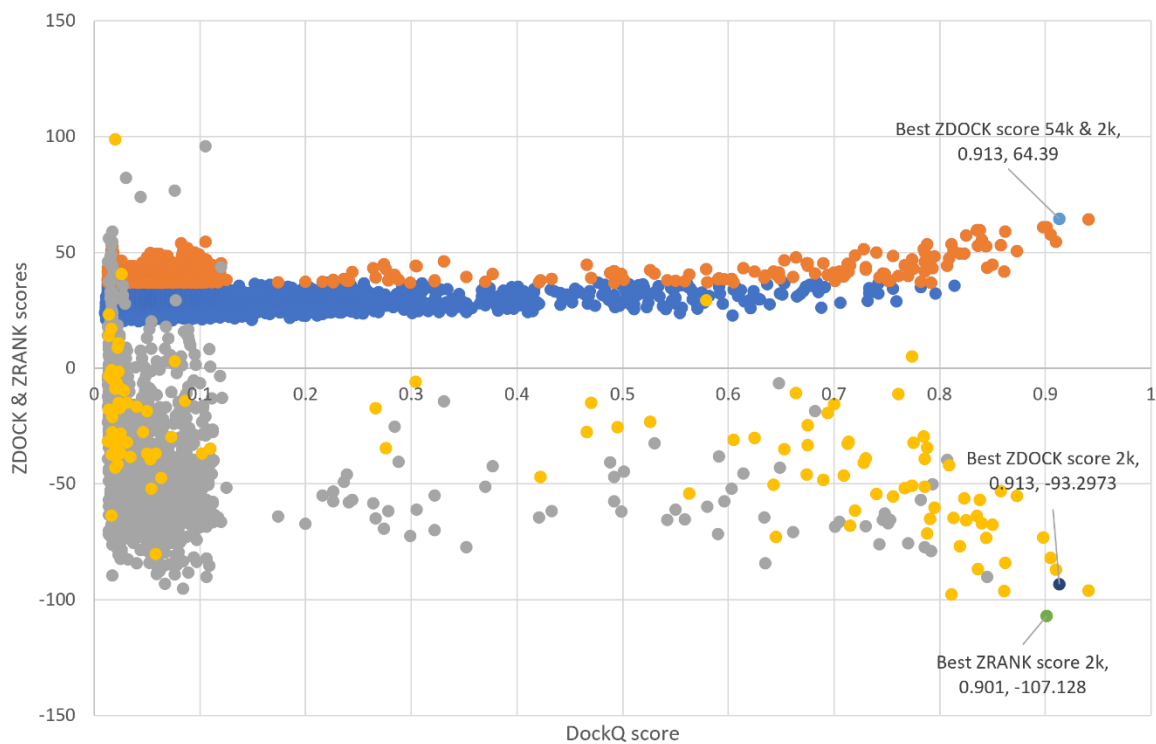

# ApikL2F-sHMA94 (7nmmHP)

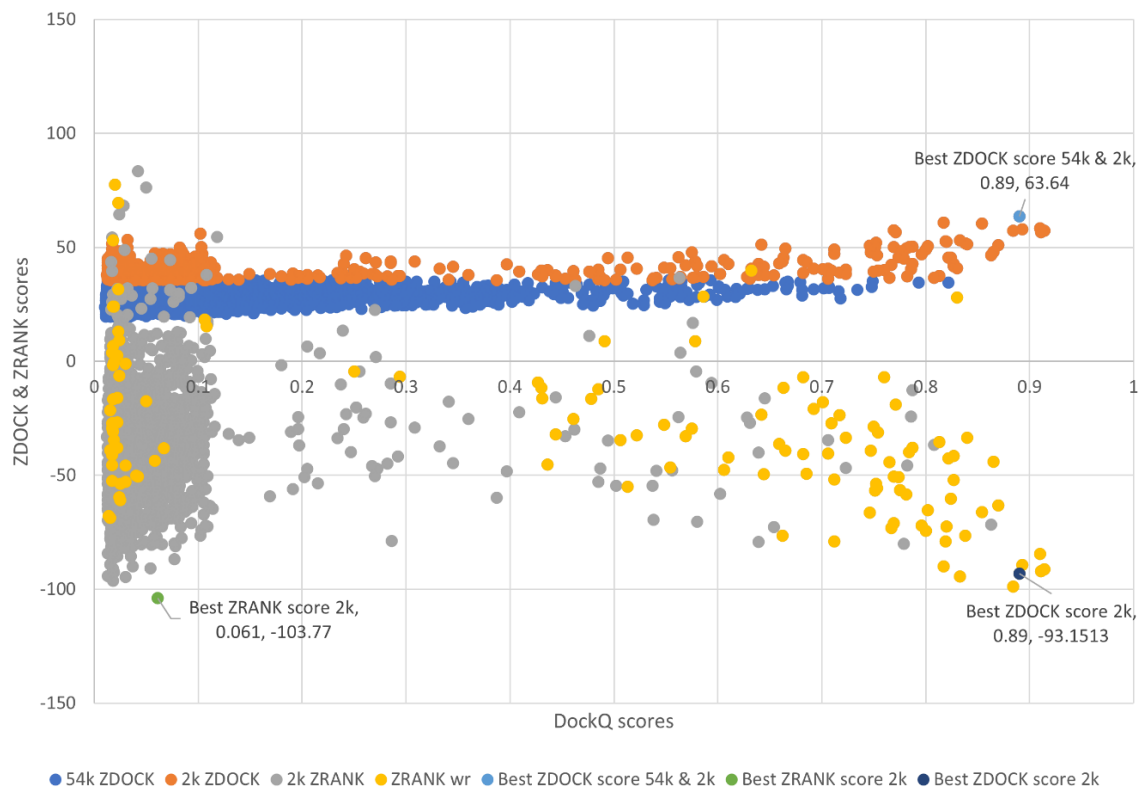

**Figure S5.** Correlation between ELE CCharPPI scoring function score and DockQ score for all complexes: AvrPikC-PikhHMA (PDB ID 7a8xBC) in blue square, AvrPikD-PikmHMA (PDB ID 6fu9AB) in orange square, AvrPikE-PikmHMA (PDB ID 6g11BC) in green triangle, AvrPikE-PikmHMA (PDB ID 6g11EF) in grey triangle, AvrPikE-PikmHMA (PDB ID 6r8mFG) in blue circle, AvrPikF-OsHIPP19 (PDB ID 7b1iBC) in yellow cross, ApikL2F-sHMA94 (PDB ID 7nmmAI) in blue asterisk, ApikL2F-sHMA94 (PDB ID 7nmmCK) in green circle, ApikL2F-sHMA94 (PDB ID 7nmmDL) in blue plus symbol, ApikL2F-sHMA94 (PDB ID 7nmmFN) in orange short dash, ApikL2F-sHMA94 (PDB ID 7nmmGO) in grey long dash, ApikL2F-sHMA94 (PDB ID 7nmmHP) in yellow diamond.

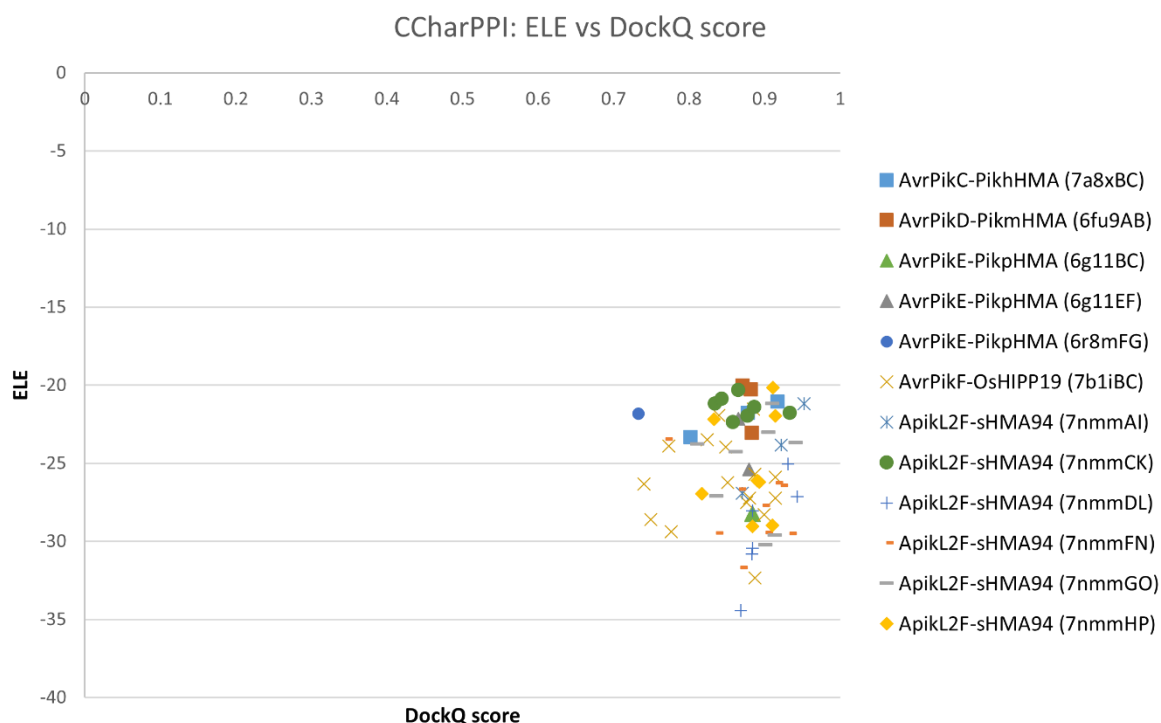

Supplement: s1 [file s1]
